# Supplementary material for: Answer ALS: A Large-Scale Resource for Sporadic and Familial ALS Combining Clinical Data with Multi-Omics Data from Induced Pluripotent Cell Lines
Source: Research Square preprint supplement (doi:10.21203/rs.3.rs-96858/v1), 2020-10-28
Supplement: Supplementary file 1 [file 0a0bbf3775d29e1034ceed4e.pdf]

## Answer ALS

|                                                                  |                                                |
|------------------------------------------------------------------|------------------------------------------------|
| Subject Number: <u>7</u> <u>1</u> <u>3</u> - ____                | Subject GUID: <u>N</u> <u>E</u> <u>U</u> _____ |
| Date: ____/____/20 <u>1</u> <u>8</u>                             | Evaluator Initials: ____                       |
| Study Visit: <input checked="" type="checkbox"/> Screening Visit |                                                |

### CREATE GUID

**GUID ID Information Sheet** – Collect at Screening Visit only AFTER the participant has signed the ICF. Information collected on this page will be utilized to generate the subject's GUID. Note that dates for date of birth should be entered as 1-31 for day, 1-12 for month, and 4 digits (YYYY) for year.

| Complete Legal Name at Birth (as it appears on birth certificate)                         |                                                            |                                            |
|-------------------------------------------------------------------------------------------|------------------------------------------------------------|--------------------------------------------|
| Legal, Given <u>First</u> <b>[REQUIRED]</b>                                               | Legal, Given <u>Middle</u> <b>[REQUIRED]</b>               | Legal, Given <u>Last</u> <b>[REQUIRED]</b> |
| Any Additional MIDDLE name(s) given at birth? <b>[OPTIONAL]</b>                           |                                                            |                                            |
| DOB                                                                                       |                                                            |                                            |
| Day of Birth[1-31] <b>[REQUIRED]</b>                                                      | Month of Birth[1-12] <b>[REQUIRED]</b>                     | Year of Birth[YYYY] <b>[REQUIRED]</b>      |
| Name of City/municipality at birth (as it appears on birth certificate) <b>[REQUIRED]</b> |                                                            |                                            |
| Country of Birth <b>[REQUIRED]</b>                                                        |                                                            |                                            |
| Physical Gender at birth <b>[REQUIRED]</b>                                                | <input type="radio"/> Male<br><input type="radio"/> Female |                                            |
| Gov't Issued or National ID <b>[OPTIONAL]</b>                                             | Not needed for this study                                  |                                            |
| <u>Country</u> issuing Gov't issued or National ID <b>[OPTIONAL]</b>                      | Not needed for this study                                  |                                            |

**Please follow your institutional SOP regarding storing confidential patient data. Do not retain this form in the subject's binder.**

### Answer ALS

|                                                                                                    |                                                                                                                                                        |
|----------------------------------------------------------------------------------------------------|--------------------------------------------------------------------------------------------------------------------------------------------------------|
| Subject Number: <u>  7  </u> <u>  1  </u> <u>  3  </u> - <u>      </u> <u>      </u> <u>      </u> | Subject GUID: <u>  N  </u> <u>  E  </u> <u>  U  </u> <u>      </u> |
| Date: <u>      </u> / <u>      </u> / <u>  2  </u> <u>  0  </u> <u>  1  </u> <u>  8  </u>          | Evaluator Initials: <u>      </u> <u>      </u> <u>      </u>                                                                                          |
| Study Visit: <input checked="" type="checkbox"/> Screening Visit                                   |                                                                                                                                                        |

In addition to the subject ID, a patient Global Unique Identifier (GUID) will be used as the identifier for individuals participating in the study in NeuroBANK™. The GUID is an 11-character string that is generated using encryption technology and algorithms licensed by the NCRI from the National Institutes of Health (NIH).

The GUID is generated on a secure website that utilizes 128-bit Secure Socket Layer (SSL). Of note, this website is not linked to NeuroBANK™. The GUID is generated using an irreversible encryption algorithm – it accepts twelve identifying data elements, (e.g. last name at birth, first name at birth, gender at birth, day, month and year of birth, city and country of birth, etc.), and produces a unique random-generated character string, or GUID. No identifying information is stored in the system; it is simply used to generate the GUID. If the same information is entered again, the same GUID will be returned.

The GUID is entered into NeuroBANK™ when the patient is being created in the system. As the same patient may participate in multiple studies, NeuroBANK™ will also allow capturing a study-specific ID for the patient.

**The Subject's 11-character GUID is**

\_\_\_\_\_

## Answer ALS

|                                                                                           |                                                                                                |
|-------------------------------------------------------------------------------------------|------------------------------------------------------------------------------------------------|
| Subject Number: <u>  7  </u> <u>  1  </u> <u>  3  </u> - <u>      </u> <u>      </u>      | Subject GUID: <u>  N  </u> <u>  E  </u> <u>  U  </u> <u>      </u> <u>      </u> <u>      </u> |
| Date: <u>      </u> / <u>      </u> / <u>  2  </u> <u>  0  </u> <u>  1  </u> <u>  8  </u> | Evaluator Initials: <u>      </u> <u>      </u> <u>      </u>                                  |
| Study Visit: <input checked="" type="checkbox"/> Screening Visit                          |                                                                                                |

### SCREENING VISIT CHECKLIST

#### Informed Consent:

- Was informed consent obtained from the subject?\* ☒ Yes ☐ No  
(Written/verbal consent must be obtained **prior** to the start of any screening procedures)
  
- The consent form, version date   2/16/2017  , for the Answer ALS study was thoroughly explained to the subject. The subject had adequate time to review the consent form and consider participation, and all questions regarding this study were answered. ☒ Yes ☐ No
  
- The subject was given a signed copy of the informed consent form. ☐ Yes ☐ No

Consenting process completed by Site Investigator or delegated study staff member per the delegation log of responsibilities: ☒ Yes ☐ No

#### Inclusion/Exclusion Review

☒ Inclusion/Exclusion Criteria Verification – *Complete Worksheet*

Screen Failure? ☐ Yes ☒ No (if yes complete worksheet)

#### Visit Procedures (\* = Complete corresponding source worksheet and EDC)

- |                                                                                                                                                                                                                                                                                                            |                                                                                                                                                                                                                                                               |
|------------------------------------------------------------------------------------------------------------------------------------------------------------------------------------------------------------------------------------------------------------------------------------------------------------|---------------------------------------------------------------------------------------------------------------------------------------------------------------------------------------------------------------------------------------------------------------|
| <input type="checkbox"/> Collect Demographic Information*<br><input type="checkbox"/> ALS History*<br><input type="checkbox"/> ALS Gene Mutations*<br><input type="checkbox"/> ALS Diagnosis / El Escorial Criteria*<br><input type="checkbox"/> Medical History*<br><input type="checkbox"/> Vital Signs* | <input type="checkbox"/> Measure Weight and Height*<br><input type="checkbox"/> Key Study Event Review*<br><input type="checkbox"/> Environmental/Social History*<br><input type="checkbox"/> Risk Factor Assessment*<br><input type="checkbox"/> Create GUID |
|------------------------------------------------------------------------------------------------------------------------------------------------------------------------------------------------------------------------------------------------------------------------------------------------------------|---------------------------------------------------------------------------------------------------------------------------------------------------------------------------------------------------------------------------------------------------------------|

#### Assessments & Outcomes

- |                                                                                                                                                                  |                                                                                                        |
|------------------------------------------------------------------------------------------------------------------------------------------------------------------|--------------------------------------------------------------------------------------------------------|
| <input type="checkbox"/> ALSFRS-R*<br><input type="checkbox"/> Ashworth Spasticity Scale*<br><input type="checkbox"/> ALS Cognitive Behavioral Screen (ALS-CBS)* | <input type="checkbox"/> Slow Vital Capacity (SVC)*<br><input type="checkbox"/> Hand Held Dynamometry* |
|------------------------------------------------------------------------------------------------------------------------------------------------------------------|--------------------------------------------------------------------------------------------------------|

#### Optional Procedures

- ☐ Lumbar Puncture for CSF Collection\*
- ☐ Blood draw for Additional Blood samples (Uric Acid, Creatinine, Phosphorus, and Creatine Kinase (CK))\*

## Answer ALS

|                                                                                           |                                                      |
|-------------------------------------------------------------------------------------------|------------------------------------------------------|
| Subject Number: <u>  7  </u> <u>  1  </u> <u>  3  </u> - <u>      </u>                    | Subject GUID: <u>  N  </u> <u>  E  </u> <u>  U  </u> |
| Date: <u>      </u> / <u>      </u> / <u>  2  </u> <u>  0  </u> <u>  1  </u> <u>  8  </u> | Evaluator Initials: <u>      </u>                    |
| Study Visit: <input checked="" type="checkbox"/> Screening Visit                          |                                                      |

### **Biomarker Studies**

☐ Blood for PBMC\*      ☐ Plasma\*

☐ Serum\*                ☐ DNA\*

### **Protocol Deviation Review**

Have there been any protocol deviations noted at this visit? ☐ Yes ☐ No

If **yes**, specify, and update the Protocol Deviation Log.

---

---

---

---

### **Concomitant Medication Review**

Have there been any concomitant medications noted at this visit? ☐ Yes ☐ No

If **yes**, specify, and update the Con-Med Log.

---

---

---

**Adverse Events** (only Adverse Events that occur AFTER signing informed consent and are directly related to study procedures will be recorded)

Have there been any adverse events noted at this visit? ☐ Yes ☐ No

If **yes**, specify, and update the Adverse Event Log.

---

---

---

**Visit Comments/Notes:**

\_\_\_\_\_  
**Signature of person obtaining information**

\_\_\_\_\_  
**Date**

## Answer ALS

|                                                                                                    |                                                                                                |
|----------------------------------------------------------------------------------------------------|------------------------------------------------------------------------------------------------|
| Subject Number: <u>  7  </u> <u>  1  </u> <u>  3  </u> - <u>      </u> <u>      </u> <u>      </u> | Subject GUID: <u>  N  </u> <u>  E  </u> <u>  U  </u> <u>      </u> <u>      </u> <u>      </u> |
| Date: <u>      </u> / <u>      </u> / <u>  2  </u> <u>  0  </u> <u>  1  </u> <u>  8  </u>          | Evaluator Initials: <u>      </u> <u>      </u> <u>      </u>                                  |
| Study Visit: <input checked="" type="checkbox"/> Screening Visit                                   |                                                                                                |

| INFORMED CONSENT FORM                                                                                                                   |                          |                          |
|-----------------------------------------------------------------------------------------------------------------------------------------|--------------------------|--------------------------|
| <b>Instructions:</b> Complete this form each time a subject signs a new version of the consent form.                                    | Yes                      | No                       |
| 1. Confirmed subject name, second identifier, and valid consent form.                                                                   | <input type="checkbox"/> | <input type="checkbox"/> |
| 2. Discussed, explained, and reviewed the consent form with the participant.                                                            | <input type="checkbox"/> | <input type="checkbox"/> |
| 3. All of the participant's questions were answered and/or concerns were addressed                                                      | <input type="checkbox"/> | <input type="checkbox"/> |
| 4. The participant agreed to participate in the study and signed/dated a valid consent form prior to the start of any study procedures. | <input type="checkbox"/> | <input type="checkbox"/> |
| 5. Caregiver/surrogate consent was obtained.                                                                                            | <input type="checkbox"/> | <input type="checkbox"/> |
| 6. A copy of the signed and dated consent form was given to the participant.                                                            | <input type="checkbox"/> | <input type="checkbox"/> |
| 7. A copy of the signed and dated consent form was placed in the subject's binder.                                                      | <input type="checkbox"/> | <input type="checkbox"/> |

**Protocol Version:**       4      

**ICF Version/Date:**   2/16/2017

## Answer ALS

|                                                                                           |                                                      |
|-------------------------------------------------------------------------------------------|------------------------------------------------------|
| Subject Number: <u>  7  </u> <u>  1  </u> <u>  3  </u> - <u>      </u> <u>      </u>      | Subject GUID: <u>  N  </u> <u>  E  </u> <u>  U  </u> |
| Date: <u>      </u> / <u>      </u> / <u>  2  </u> <u>  0  </u> <u>  1  </u> <u>  8  </u> | Evaluator Initials: <u>      </u> <u>      </u>      |
| Study Visit: <input checked="" type="checkbox"/> Screening Visit                          |                                                      |

| INCLUSION/EXCLUSION CRITERIA REVIEW                                                                                                                                                                                                                                                 |                          |                          |                          |
|-------------------------------------------------------------------------------------------------------------------------------------------------------------------------------------------------------------------------------------------------------------------------------------|--------------------------|--------------------------|--------------------------|
| <b>All subjects enrolled must meet eligibility criteria based on the inclusion/exclusion criteria detailed in the application and approved by the IRB.</b>                                                                                                                          |                          |                          |                          |
| <b>Inclusion Criteria</b><br>[NOTE: The answer to question 2, 3, or 4 must be “Yes” for the subject to be eligible.]                                                                                                                                                                | Yes                      | No                       | N/A                      |
| 1. The subject is male or female, aged 18 to 100, inclusive.                                                                                                                                                                                                                        | <input type="checkbox"/> | <input type="checkbox"/> |                          |
| 2. The subject has been diagnosed with possible, laboratory-supported probable, probable or definite (according to the WFN El Escorial criteria) familial or sporadic ALS.                                                                                                          | <input type="checkbox"/> | <input type="checkbox"/> |                          |
| 3. The subject has a clinically diagnosed motor neuron disorder (MND), including primary lateral sclerosis (PLS), flail arm ALS, progressive muscular atrophy (PMA), monomelic amyotrophy, or another clinical variant of neurodegenerative MND (See Appendix 1 of Study Protocol). | <input type="checkbox"/> | <input type="checkbox"/> |                          |
| 4. If the subject is an asymptomatic participant, he/she has documentation of the presence of a gene known to cause ALS.                                                                                                                                                            | <input type="checkbox"/> | <input type="checkbox"/> | <input type="checkbox"/> |
| <b>Exclusion Criteria</b><br>[NOTE: If the answer to question 1 or 2 below is “Yes,” then the patient is ineligible.]                                                                                                                                                               | Yes                      | No                       | N/A                      |
| 1. The participant has Spinal-Bulbar Muscular Atrophy.                                                                                                                                                                                                                              | <input type="checkbox"/> | <input type="checkbox"/> |                          |
| 2. The participant has a known diagnosis of HIV/AIDS, Hepatitis B, or Hepatitis C.                                                                                                                                                                                                  | <input type="checkbox"/> | <input type="checkbox"/> |                          |

## Answer ALS

|                                                                  |                                                |
|------------------------------------------------------------------|------------------------------------------------|
| Subject Number: <u>7</u> <u>1</u> <u>3</u> - _____               | Subject GUID: <u>N</u> <u>E</u> <u>U</u> _____ |
| Date: ____/____/20 <u>1</u> <u>8</u>                             | Evaluator Initials: _____                      |
| Study Visit: <input checked="" type="checkbox"/> Screening Visit |                                                |

| ELIGIBILITY CONFIRMATION                                                                                               |                                                                                                                                                                                                                |                          |            |
|------------------------------------------------------------------------------------------------------------------------|----------------------------------------------------------------------------------------------------------------------------------------------------------------------------------------------------------------|--------------------------|------------|
|                                                                                                                        | <u>Yes</u>                                                                                                                                                                                                     | <u>No</u>                | <u>N/A</u> |
| Did the subject read, understand, and provide informed consent for this study?                                         | <input type="checkbox"/>                                                                                                                                                                                       | <input type="checkbox"/> |            |
| Date consent was received: ____/____/____ (MM/DD/YYYY)<br>Person who Obtained Consent: _____                           |                                                                                                                                                                                                                |                          |            |
| Consent Version: <u>4</u><br>Is this a re-consent? <input type="checkbox"/> Yes <input checked="" type="checkbox"/> No |                                                                                                                                                                                                                |                          |            |
| Does the subject satisfy all inclusion and exclusion criteria for this study?                                          | <input type="checkbox"/>                                                                                                                                                                                       | <input type="checkbox"/> |            |
| Consent Process Description:                                                                                           | Explained study and procedures. Went through consent with participant.<br>Explained risks and that they may withdraw at any time. Answered questions. Had participant sign consent.<br>_____<br>_____<br>_____ |                          |            |

| STATEMENT OF ELIGIBILITY                                                                                                                  |       |
|-------------------------------------------------------------------------------------------------------------------------------------------|-------|
| This subject is [ <input type="checkbox"/> <b>eligible</b> / <input type="checkbox"/> <b>ineligible</b> ] for participation in the study. |       |
| Principal Investigator Signature:                                                                                                         | Date: |
| Printed Name:                                                                                                                             |       |

### Answer ALS

|                                                                  |                                                |
|------------------------------------------------------------------|------------------------------------------------|
| Subject Number: <u>7</u> <u>1</u> <u>3</u> - ____                | Subject GUID: <u>N</u> <u>E</u> <u>U</u> _____ |
| Date: ____/____/ <u>2</u> <u>0</u> <u>1</u> <u>8</u>             | Evaluator Initials: ____                       |
| Study Visit: <input checked="" type="checkbox"/> Screening Visit |                                                |

#### SCREEN FAILURE

Instructions: Please complete this form if the subject was considered ineligible and a protocol waiver(s) was not granted, if the subject decided to withdraw consent during the screening process, or for any other reason.

Please specify reason for screen failure:

☐ Subject did not meet inclusion criteria (Select all that apply):

☐ Failed inclusion criteria (list):

---

---

☐ Subject did not meet exclusion criteria (Select all that apply):

☐ Failed exclusion criteria (list):

---

---

☐ Subject withdrew consent during the screening process

☐ Other (specify): \_\_\_\_\_

---

---

---

---

---

---



## Answer ALS

|                                                                                                    |                                                                                                |
|----------------------------------------------------------------------------------------------------|------------------------------------------------------------------------------------------------|
| Subject Number: <u>  7  </u> <u>  1  </u> <u>  3  </u> - <u>      </u> <u>      </u> <u>      </u> | Subject GUID: <u>  N  </u> <u>  E  </u> <u>  U  </u> <u>      </u> <u>      </u> <u>      </u> |
| Date: <u>      </u> / <u>      </u> / <u>  2  </u> <u>  0  </u> <u>  1  </u> <u>  8  </u>          | Evaluator Initials: <u>      </u> <u>      </u> <u>      </u>                                  |
| Study Visit: <input checked="" type="checkbox"/> Screening Visit                                   |                                                                                                |

| ALS History                                                                                                                                                                                                                                                                                                                                                                                                                                                                                                                                                                                                                                                                                                                                                                                                                                                                                                                                                                                                                                                                                                                                                                                                                                                                                                                                                                                                                                                         |
|---------------------------------------------------------------------------------------------------------------------------------------------------------------------------------------------------------------------------------------------------------------------------------------------------------------------------------------------------------------------------------------------------------------------------------------------------------------------------------------------------------------------------------------------------------------------------------------------------------------------------------------------------------------------------------------------------------------------------------------------------------------------------------------------------------------------------------------------------------------------------------------------------------------------------------------------------------------------------------------------------------------------------------------------------------------------------------------------------------------------------------------------------------------------------------------------------------------------------------------------------------------------------------------------------------------------------------------------------------------------------------------------------------------------------------------------------------------------|
| Where was the ALS diagnosis made: <input type="checkbox"/> Outside center <input type="checkbox"/> ALS center                                                                                                                                                                                                                                                                                                                                                                                                                                                                                                                                                                                                                                                                                                                                                                                                                                                                                                                                                                                                                                                                                                                                                                                                                                                                                                                                                       |
| Date of symptom onset: <u>      </u> / <u>      </u> / <u>      </u> <u>      </u> (MM/DD/YYYY)                                                                                                                                                                                                                                                                                                                                                                                                                                                                                                                                                                                                                                                                                                                                                                                                                                                                                                                                                                                                                                                                                                                                                                                                                                                                                                                                                                     |
| Date of diagnosis: <u>      </u> / <u>      </u> / <u>      </u> <u>      </u> (MM/DD/YYYY)                                                                                                                                                                                                                                                                                                                                                                                                                                                                                                                                                                                                                                                                                                                                                                                                                                                                                                                                                                                                                                                                                                                                                                                                                                                                                                                                                                         |
| <p>Site of onset – check all that apply</p> <div style="margin-left: 20px;"> <input type="checkbox"/> Bulbar<br/> <div style="margin-left: 20px;"> <input type="checkbox"/> Speech                      <input type="checkbox"/> Swallowing </div> </div> <div style="margin-left: 20px;"> <input type="checkbox"/> Axial<br/> <div style="margin-left: 20px;"> <input type="checkbox"/> Neck<br/> <input type="checkbox"/> Trunk<br/> <input type="checkbox"/> Respiratory </div> </div> <div style="margin-left: 20px;"> <input type="checkbox"/> Limb<br/> <div style="margin-left: 20px;"> <input type="checkbox"/> Upper<br/> <div style="margin-left: 20px;"> <input type="checkbox"/> Left<br/> <input type="checkbox"/> Right<br/> <div style="margin-left: 20px;"> <input type="checkbox"/> Hand/fingers                      <input type="checkbox"/> Arm </div> </div> </div> <div style="margin-left: 20px;"> <input type="checkbox"/> Lower<br/> <div style="margin-left: 20px;"> <input type="checkbox"/> Left<br/> <input type="checkbox"/> Right<br/> <div style="margin-left: 20px;"> <input type="checkbox"/> Ankle/foot/toes                      <input type="checkbox"/> Leg </div> </div> </div> <div style="margin-left: 20px;"> <input type="checkbox"/> Other, specify:<br/> <br/> <hr style="border: 0; border-top: 1px solid black; margin: 5px 0;"/> <hr style="border: 0; border-top: 1px solid black; margin: 5px 0;"/> </div> </div> |

## Answer ALS

|                                                                                           |                                                                                                |
|-------------------------------------------------------------------------------------------|------------------------------------------------------------------------------------------------|
| Subject Number: <u>  7  </u> <u>  1  </u> <u>  3  </u> - <u>      </u> <u>      </u>      | Subject GUID: <u>  N  </u> <u>  E  </u> <u>  U  </u> <u>      </u> <u>      </u> <u>      </u> |
| Date: <u>      </u> / <u>      </u> / <u>  2  </u> <u>  0  </u> <u>  1  </u> <u>  8  </u> | Evaluator Initials: <u>      </u> <u>      </u> <u>      </u>                                  |
| Study Visit: <input checked="" type="checkbox"/> Screening Visit                          |                                                                                                |

| ALS Gene Mutation        |                 |                                                                        |            |
|--------------------------|-----------------|------------------------------------------------------------------------|------------|
| Not Tested               | Mutation        | Result                                                                 | Laboratory |
| <input type="checkbox"/> | ANG             | <input type="checkbox"/> Positive<br><input type="checkbox"/> Negative |            |
| <input type="checkbox"/> | C9ORF72         | <input type="checkbox"/> Positive<br><input type="checkbox"/> Negative |            |
| <input type="checkbox"/> | FUS             | <input type="checkbox"/> Positive<br><input type="checkbox"/> Negative |            |
| <input type="checkbox"/> | PROGRANULIN     | <input type="checkbox"/> Positive<br><input type="checkbox"/> Negative |            |
| <input type="checkbox"/> | SETX            | <input type="checkbox"/> Positive<br><input type="checkbox"/> Negative |            |
| <input type="checkbox"/> | SOD1            | <input type="checkbox"/> Positive<br><input type="checkbox"/> Negative |            |
| <input type="checkbox"/> | TAU             | <input type="checkbox"/> Positive<br><input type="checkbox"/> Negative |            |
| <input type="checkbox"/> | TDP-43          | <input type="checkbox"/> Positive<br><input type="checkbox"/> Negative |            |
| <input type="checkbox"/> | VAPB            | <input type="checkbox"/> Positive<br><input type="checkbox"/> Negative |            |
| <input type="checkbox"/> | VCP             | <input type="checkbox"/> Positive<br><input type="checkbox"/> Negative |            |
| <input type="checkbox"/> | Other, specify: | <input type="checkbox"/> Positive<br><input type="checkbox"/> Negative |            |

## Answer ALS

|                                                                                           |                                                                                  |
|-------------------------------------------------------------------------------------------|----------------------------------------------------------------------------------|
| Subject Number: <u>  7  </u> <u>  1  </u> <u>  3  </u> - <u>      </u> <u>      </u>      | Subject GUID: <u>  N  </u> <u>  E  </u> <u>  U  </u> <u>      </u> <u>      </u> |
| Date: <u>      </u> / <u>      </u> / <u>  2  </u> <u>  0  </u> <u>  1  </u> <u>  8  </u> | Evaluator Initials: <u>      </u> <u>      </u>                                  |
| Study Visit: <input checked="" type="checkbox"/> Screening Visit                          |                                                                                  |

### ALS DIAGNOSIS

**Does the subject have:**

**Yes**

**No**

**Not  
Done**

1. Topographical location and pattern of progression of UMN and LMN signs, including signs of spread within a region or to other regions, consistent with ALS?

☐
☐

2. Exclusion by electrophysiological testing of all other processes including conduction block that might explain the underlying signs and symptoms?

☐
☐
☐

3. Exclusion by neuroimaging of other disease processes such as myelopathy or radiculopathy that might explain observed clinical and electrophysiological signs?

☐
☐
☐

**Please check YES or NO if signs are present.**

|        | CLINICAL                 |                          |                          |                          |                          |                          | EMG                      |                          |                          |
|--------|--------------------------|--------------------------|--------------------------|--------------------------|--------------------------|--------------------------|--------------------------|--------------------------|--------------------------|
|        | UMN                      |                          |                          | LMN                      |                          |                          | LMN                      |                          |                          |
|        | Yes                      | No                       | Not Done                 | Yes                      | No                       | Not Done                 | Yes                      | No                       | Not Done                 |
| BULBAR | <input type="checkbox"/> |
| LUE    | <input type="checkbox"/> |
| RUE    | <input type="checkbox"/> |
| TRUNK  | <input type="checkbox"/> |
| LLE    | <input type="checkbox"/> |
| RLE    | <input type="checkbox"/> |

### Answer ALS

|                                                                                                    |                                                                                                |
|----------------------------------------------------------------------------------------------------|------------------------------------------------------------------------------------------------|
| Subject Number: <u>  7  </u> <u>  1  </u> <u>  3  </u> - <u>      </u> <u>      </u> <u>      </u> | Subject GUID: <u>  N  </u> <u>  E  </u> <u>  U  </u> <u>      </u> <u>      </u> <u>      </u> |
| Date: <u>      </u> / <u>      </u> / <u>  2  </u> <u>  0  </u> <u>  1  </u> <u>  8  </u>          | Evaluator Initials: <u>      </u> <u>      </u> <u>      </u>                                  |
| Study Visit: <input checked="" type="checkbox"/> Screening Visit                                   |                                                                                                |

| ALS DIAGNOSIS                                                                                                                                                                                                                                                                        |
|--------------------------------------------------------------------------------------------------------------------------------------------------------------------------------------------------------------------------------------------------------------------------------------|
| <b>EI Escorial criteria for ALS (select one):</b><br><br><input type="checkbox"/> Suspected<br><br><input type="checkbox"/> Possible<br><br><input type="checkbox"/> Probable laboratory supported<br><br><input type="checkbox"/> Probable<br><br><input type="checkbox"/> Definite |

\_\_\_\_\_  
**Site Investigator Signature**

\_\_\_\_\_  
**Date (MM/DD/YYYY)**

## Answer ALS

|                                                                                                    |                                                                                                |
|----------------------------------------------------------------------------------------------------|------------------------------------------------------------------------------------------------|
| Subject Number: <u>  7  </u> <u>  1  </u> <u>  3  </u> - <u>      </u> <u>      </u> <u>      </u> | Subject GUID: <u>  N  </u> <u>  E  </u> <u>  U  </u> <u>      </u> <u>      </u> <u>      </u> |
| Date: <u>      </u> / <u>      </u> / <u>  2  </u> <u>  0  </u> <u>  1  </u> <u>  8  </u>          | Evaluator Initials: <u>      </u> <u>      </u> <u>      </u>                                  |
| Study Visit: <input checked="" type="checkbox"/> Screening Visit                                   |                                                                                                |

| <b>Family History</b>                                                                                                         |                                                                        |                                                                  |                                      |                                                             |                                |
|-------------------------------------------------------------------------------------------------------------------------------|------------------------------------------------------------------------|------------------------------------------------------------------|--------------------------------------|-------------------------------------------------------------|--------------------------------|
| <b>Instructions:</b> Enter one relative per line. Make as many copies of this form as necessary to record all family history. |                                                                        |                                                                  |                                      |                                                             |                                |
| Relative<br>(enter code or specify)                                                                                           | Hereditary                                                             | Gender                                                           | Medical Condition<br>(enter code(s)) | Genetic Testing Performed?                                  | Known Mutation<br>(enter code) |
|                                                                                                                               | <input type="checkbox"/> Paternal<br><input type="checkbox"/> Maternal | <input type="checkbox"/> Male<br><input type="checkbox"/> Female |                                      | <input type="checkbox"/> Yes<br><input type="checkbox"/> No |                                |
|                                                                                                                               | <input type="checkbox"/> Paternal<br><input type="checkbox"/> Maternal | <input type="checkbox"/> Male<br><input type="checkbox"/> Female |                                      | <input type="checkbox"/> Yes<br><input type="checkbox"/> No |                                |
|                                                                                                                               | <input type="checkbox"/> Paternal<br><input type="checkbox"/> Maternal | <input type="checkbox"/> Male<br><input type="checkbox"/> Female |                                      | <input type="checkbox"/> Yes<br><input type="checkbox"/> No |                                |
|                                                                                                                               | <input type="checkbox"/> Paternal<br><input type="checkbox"/> Maternal | <input type="checkbox"/> Male<br><input type="checkbox"/> Female |                                      | <input type="checkbox"/> Yes<br><input type="checkbox"/> No |                                |
|                                                                                                                               | <input type="checkbox"/> Paternal<br><input type="checkbox"/> Maternal | <input type="checkbox"/> Male<br><input type="checkbox"/> Female |                                      | <input type="checkbox"/> Yes<br><input type="checkbox"/> No |                                |
|                                                                                                                               | <input type="checkbox"/> Paternal<br><input type="checkbox"/> Maternal | <input type="checkbox"/> Male<br><input type="checkbox"/> Female |                                      | <input type="checkbox"/> Yes<br><input type="checkbox"/> No |                                |
|                                                                                                                               | <input type="checkbox"/> Paternal<br><input type="checkbox"/> Maternal | <input type="checkbox"/> Male<br><input type="checkbox"/> Female |                                      | <input type="checkbox"/> Yes<br><input type="checkbox"/> No |                                |
|                                                                                                                               | <input type="checkbox"/> Paternal<br><input type="checkbox"/> Maternal | <input type="checkbox"/> Male<br><input type="checkbox"/> Female |                                      | <input type="checkbox"/> Yes<br><input type="checkbox"/> No |                                |

|                                                                                                                                                                                                                          |                                                                                                                                                                                                                                                                                                                                                                                                         |                                                                                                                                 |
|--------------------------------------------------------------------------------------------------------------------------------------------------------------------------------------------------------------------------|---------------------------------------------------------------------------------------------------------------------------------------------------------------------------------------------------------------------------------------------------------------------------------------------------------------------------------------------------------------------------------------------------------|---------------------------------------------------------------------------------------------------------------------------------|
| <b>Relative:</b><br>1=Mother<br>2=Father<br>3=Sister<br>4=Brother<br>5=Half-sister<br>6=Half Brother<br>7=Daughter<br>8=Son<br>9=Grandmother<br>10=Grandfather<br>11=Aunt<br>12=Uncle<br>13=Cousin<br>14=OTHER, Specify: | <b>Medical Condition – select all that apply:</b><br>1=Alzheimer’s disease<br>2=ALS<br>3=Dementia<br>4=Down’s syndrome<br>5=Frontotemporal Dementia<br>6=Huntington’s disease<br>7=Parkinson’s disease<br>8=Psychiatric disorder, specify:<br>9=Arthritis<br>10=Asthma<br>11=Cancer<br>12=Circulation problems<br>13=Diabetes<br>14=Heart Disease<br>15=Lung disease<br>16=Stroke<br>17=OTHER, Specify: | <b>Known Mutations:</b><br>1=ANG<br>2=C9ORF72<br>3=FUS<br>4=SETX<br>5=SOD1<br>6=TDP-43<br>7=VAPB<br>8=VCP<br>9= OTHER, Specify: |
|--------------------------------------------------------------------------------------------------------------------------------------------------------------------------------------------------------------------------|---------------------------------------------------------------------------------------------------------------------------------------------------------------------------------------------------------------------------------------------------------------------------------------------------------------------------------------------------------------------------------------------------------|---------------------------------------------------------------------------------------------------------------------------------|

## Answer ALS

|                                                                  |                                                |
|------------------------------------------------------------------|------------------------------------------------|
| Subject Number: <u>7</u> <u>1</u> <u>3</u> - ____                | Subject GUID: <u>N</u> <u>E</u> <u>U</u> _____ |
| Date: ____/____/20 <u>18</u>                                     | Evaluator Initials: ____                       |
| Study Visit: <input checked="" type="checkbox"/> Screening Visit |                                                |

### MEDICAL HISTORY

**Instructions:** Please enter any and all medical history the patient may have experienced in their lifetime. Make as many copies of this form as necessary to record all relevant past medical history.

| Description | Year of Diagnosis<br>(YYYY) | Still Present?<br>(Yes/No)                                  |
|-------------|-----------------------------|-------------------------------------------------------------|
|             |                             | <input type="checkbox"/> Yes<br><input type="checkbox"/> No |
|             |                             | <input type="checkbox"/> Yes<br><input type="checkbox"/> No |
|             |                             | <input type="checkbox"/> Yes<br><input type="checkbox"/> No |
|             |                             | <input type="checkbox"/> Yes<br><input type="checkbox"/> No |
|             |                             | <input type="checkbox"/> Yes<br><input type="checkbox"/> No |
|             |                             | <input type="checkbox"/> Yes<br><input type="checkbox"/> No |
|             |                             | <input type="checkbox"/> Yes<br><input type="checkbox"/> No |
|             |                             | <input type="checkbox"/> Yes<br><input type="checkbox"/> No |
|             |                             | <input type="checkbox"/> Yes<br><input type="checkbox"/> No |
|             |                             | <input type="checkbox"/> Yes<br><input type="checkbox"/> No |
|             |                             | <input type="checkbox"/> Yes<br><input type="checkbox"/> No |
|             |                             | <input type="checkbox"/> Yes<br><input type="checkbox"/> No |
|             |                             | <input type="checkbox"/> Yes<br><input type="checkbox"/> No |
|             |                             | <input type="checkbox"/> Yes<br><input type="checkbox"/> No |
|             |                             | <input type="checkbox"/> Yes<br><input type="checkbox"/> No |
|             |                             | <input type="checkbox"/> Yes<br><input type="checkbox"/> No |
|             |                             | <input type="checkbox"/> Yes<br><input type="checkbox"/> No |

### Answer ALS

|                                                                                           |                                                                                                |
|-------------------------------------------------------------------------------------------|------------------------------------------------------------------------------------------------|
| Subject Number: <u>  7  </u> <u>  1  </u> <u>  3  </u> - <u>      </u> <u>      </u>      | Subject GUID: <u>  N  </u> <u>  E  </u> <u>  U  </u> <u>      </u> <u>      </u> <u>      </u> |
| Date: <u>      </u> / <u>      </u> / <u>  2  </u> <u>  0  </u> <u>  1  </u> <u>  8  </u> | Evaluator Initials: <u>      </u> <u>      </u> <u>      </u>                                  |
| Study Visit: <input checked="" type="checkbox"/> Screening Visit                          |                                                                                                |

| DEMOGRAPHICS                                                                                                                                                                                                                                                                                                                       |
|------------------------------------------------------------------------------------------------------------------------------------------------------------------------------------------------------------------------------------------------------------------------------------------------------------------------------------|
| Date of Birth: <u>      </u> / <u>      </u> / <u>      </u> <u>      </u> (MM/DD/YYYY)                                                                                                                                                                                                                                            |
| Age: <u>          </u>                                                                                                                                                                                                                                                                                                             |
| Gender: <input type="checkbox"/> Male <input type="checkbox"/> Female                                                                                                                                                                                                                                                              |
| <p><b>*Ethnic Category (Select <b>one</b>):</b></p> <p><input type="checkbox"/> Non-Hispanic or Latino</p> <p><input type="checkbox"/> Hispanic or Latino</p>                                                                                                                                                                      |
| <p><b>*Racial Categories (Select <b>all that apply</b>):</b></p> <p><input type="checkbox"/> White</p> <p><input type="checkbox"/> Black/African American</p> <p><input type="checkbox"/> Asian</p> <p><input type="checkbox"/> Native Hawaiian/Pacific Islander</p> <p><input type="checkbox"/> American Indian/Alaska Native</p> |
| <b>*PLEASE NOTE: Ethnic and Racial categories collected via subject self-report</b>                                                                                                                                                                                                                                                |

## Answer ALS

|                                                                                           |                                                      |
|-------------------------------------------------------------------------------------------|------------------------------------------------------|
| Subject Number: <u>  7  </u> <u>  1  </u> <u>  3  </u> - <u>      </u>                    | Subject GUID: <u>  N  </u> <u>  E  </u> <u>  U  </u> |
| Date: <u>      </u> / <u>      </u> / <u>  2  </u> <u>  0  </u> <u>  1  </u> <u>  8  </u> | Evaluator Initials: <u>      </u>                    |
| Study Visit: <input checked="" type="checkbox"/> Screening Visit                          |                                                      |

### CNS-LABILITY SCALE

Date Performed:               /               /                     

Evaluator's Initials:                     

#### INSTRUCTIONS FOR SUBJECT

**Please select the number that describes the degree to which each item has applied to you DURING THE PAST WEEK.**

|                                                                                                                                               | Does not<br>Apply | Rarely<br>Applies | Occasionally<br>Applies | Frequently<br>Applies | Applies Most<br>of the Time |
|-----------------------------------------------------------------------------------------------------------------------------------------------|-------------------|-------------------|-------------------------|-----------------------|-----------------------------|
| 1. There are times when I feel fine 1 minute, and then I'll become tearful the next over something small or for no reason at all.             | 1                 | 2                 | 3                       | 4                     | 5                           |
| 2. Others have told me that I seem to become amused very easily or that I seem to become amused about things that aren't funny.               | 1                 | 2                 | 3                       | 4                     | 5                           |
| 3. I find myself crying very easily.                                                                                                          | 1                 | 2                 | 3                       | 4                     | 5                           |
| 4. I find that even when I try to control my laughter, I am often unable to do so.                                                            | 1                 | 2                 | 3                       | 4                     | 5                           |
| 5. There are times when I won't be thinking of anything happy or funny at all, but then I'll suddenly be overcome by funny or happy thoughts. | 1                 | 2                 | 3                       | 4                     | 5                           |
| 6. I find that even when I try to control my crying, I am often unable to do so.                                                              | 1                 | 2                 | 3                       | 4                     | 5                           |
| 7. I find that I am easily overcome by laughter.                                                                                              | 1                 | 2                 | 3                       | 4                     | 5                           |



## Answer ALS

|                                                                  |                                                |
|------------------------------------------------------------------|------------------------------------------------|
| Subject Number: <u>7</u> <u>1</u> <u>3</u> - _____               | Subject GUID: <u>N</u> <u>E</u> <u>U</u> _____ |
| Date: ____/____/20 <u>18</u>                                     | Evaluator Initials: _____                      |
| Study Visit: <input checked="" type="checkbox"/> Screening Visit |                                                |

| VITAL SIGNS              |                                  |                                     |                                                                                    |                                                                                                                                                                                                                                           |
|--------------------------|----------------------------------|-------------------------------------|------------------------------------------------------------------------------------|-------------------------------------------------------------------------------------------------------------------------------------------------------------------------------------------------------------------------------------------|
| Not Done                 | Test                             | Measurement                         | Unit                                                                               | Measurement Specification                                                                                                                                                                                                                 |
| <input type="checkbox"/> | Temperature                      | _____.                              | <input type="checkbox"/> °F<br><input checked="" type="checkbox"/> °C              | Method (Select One):<br><input type="checkbox"/> Axillary<br><input type="checkbox"/> Oral<br><input type="checkbox"/> Rectal<br><input type="checkbox"/> Tympanic<br><input checked="" type="checkbox"/> Other (specify): __temporal____ |
| <input type="checkbox"/> | Blood Pressure                   | Systolic: _____<br>Diastolic: _____ | mmHg                                                                               | Position (Select One):<br><input type="checkbox"/> Standing <input type="checkbox"/> Left Arm<br><input checked="" type="checkbox"/> Sitting <input type="checkbox"/> Right Arm<br><input type="checkbox"/> Supine                        |
| <input type="checkbox"/> | Heart Rate                       | _____                               | beats/min                                                                          |                                                                                                                                                                                                                                           |
| <input type="checkbox"/> | Respiratory Rate                 | _____                               | breaths/min                                                                        |                                                                                                                                                                                                                                           |
| <input type="checkbox"/> | Weight                           | _____                               | <input checked="" type="checkbox"/> pounds<br><input type="checkbox"/> kilograms   |                                                                                                                                                                                                                                           |
| <input type="checkbox"/> | Height ( <i>Screening Only</i> ) | _____                               | <input checked="" type="checkbox"/> inches<br><input type="checkbox"/> centimeters |                                                                                                                                                                                                                                           |
| <input type="checkbox"/> | BMI                              | _____                               |                                                                                    |                                                                                                                                                                                                                                           |

### Answer ALS

|                                                                  |                                                |
|------------------------------------------------------------------|------------------------------------------------|
| Subject Number: <u>7</u> <u>1</u> <u>3</u> - ____                | Subject GUID: <u>N</u> <u>E</u> <u>U</u> _____ |
| Date: ____/____/ <u>2</u> <u>0</u> <u>1</u> <u>8</u>             | Evaluator Initials: ____                       |
| Study Visit: <input checked="" type="checkbox"/> Screening Visit |                                                |

#### VITAL CAPACITY

**Instructions:** A printout from the spirometer of all Slow Vital Capacity (SVC) or Forced Vital Capacity (FVC) trials will be retained. Three VC trials are required for each testing session, however up to 5 trials may be performed if the variability between the highest and second highest VC is 10% or greater for the first 3 trials. Up to three of the best trials are recorded on the CRF in the EDC.

**Type of Vital Capacity Collected:**

- ☐ SVC  
☐ FVC

**Position:**

- ☐ Supine  
☐ Upright  
☐ Unknown

**PLACE SPIROMETER PRINTOUT HERE**

**\*\*Must be signed and dated by the Evaluator\*\***

## Answer ALS

|                                                                  |                                                |
|------------------------------------------------------------------|------------------------------------------------|
| Subject Number: <u>7</u> <u>1</u> <u>3</u> - ____                | Subject GUID: <u>N</u> <u>E</u> <u>U</u> _____ |
| Date: ____/____/ <u>2</u> <u>0</u> <u>1</u> <u>8</u>             | Evaluator Initials: ____                       |
| Study Visit: <input checked="" type="checkbox"/> Screening Visit |                                                |

| ALSFRS-R                                                                                                                                                                                                                                                                                                                        |       |
|---------------------------------------------------------------------------------------------------------------------------------------------------------------------------------------------------------------------------------------------------------------------------------------------------------------------------------|-------|
| Was the ALSFRS-R Performed? <input type="checkbox"/> Yes <input type="checkbox"/> No                                                                                                                                                                                                                                            |       |
| Responded by: <input type="checkbox"/> Patient <input type="checkbox"/> Patient via Caregiver                                                                                                                                                                                                                                   |       |
| Mode of Administration: <input type="checkbox"/> In person <input type="checkbox"/> Telephone <input type="checkbox"/> Other: _____                                                                                                                                                                                             |       |
| QUESTIONS:                                                                                                                                                                                                                                                                                                                      | SCORE |
| <b>1. Speech</b><br>4 = Normal speech processes<br>3 = Detectable speech disturbances<br>2 = Intelligible with repeating<br>1 = Speech combined with non-vocal communication<br>0 = Loss of useful speech                                                                                                                       |       |
| <b>2. Salivation</b><br>4 = Normal<br>3 = Slight but definite excess of saliva in mouth; may have nighttime drooling<br>2 = Moderately excessive saliva; may have minimal drooling<br>1 = Marked excess of saliva with some drooling<br>0 = Marked drooling; requires constant tissue or handkerchief                           |       |
| <b>3. Swallowing</b><br>4 = Normal eating habits<br>3 = Early eating problems – occasional choking<br>2 = Dietary consistency changes<br>1 = Needs supplemental tube feeding<br>0 = NPO (exclusively parenteral or enteral feeding)                                                                                             |       |
| <b>4. Handwriting</b><br>4 = Normal<br>3 = Slow or sloppy; all words are legible<br>2 = Not all words are legible<br>1 = No words are legible but can still grip a pen<br>0 = Unable to grip pen                                                                                                                                |       |
| <b>5a. Cutting Food and Handling Utensils (patients without gastrostomy)</b><br>4 = Normal<br>3 = Somewhat slow and clumsy, but no help needed<br>2 = Can cut most foods, although clumsy and slow; some help needed<br>1 = Food must be cut by someone, but can still feed slowly<br>0 = Needs to be fed                       |       |
| <b>5b. Cutting Food and Handling Utensils (alternate scale for patients with gastrostomy)</b><br>4 = Normal<br>3 = Clumsy, but able to perform all manipulations independently<br>2 = Some help needed with closures and fasteners<br>1 = Provides minimal assistance to caregivers<br>0 = Unable to perform any aspect of task |       |

## Answer ALS

|                                                                                                    |                                                                                                |
|----------------------------------------------------------------------------------------------------|------------------------------------------------------------------------------------------------|
| Subject Number: <u>  7  </u> <u>  1  </u> <u>  3  </u> - <u>      </u> <u>      </u> <u>      </u> | Subject GUID: <u>  N  </u> <u>  E  </u> <u>  U  </u> <u>      </u> <u>      </u> <u>      </u> |
| Date: <u>      </u> / <u>      </u> / <u>  2  </u> <u>  0  </u> <u>  1  </u> <u>  8  </u>          | Evaluator Initials: <u>      </u> <u>      </u> <u>      </u>                                  |
| Study Visit: <input checked="" type="checkbox"/> Screening Visit                                   |                                                                                                |

|                                                                                                                                                                                                                                                                                                      |  |
|------------------------------------------------------------------------------------------------------------------------------------------------------------------------------------------------------------------------------------------------------------------------------------------------------|--|
| <b>6. Dressing and Hygiene</b><br>4 = Normal function<br>3 = Independent, can complete self-care with effort or decreased efficiency<br>2 = Intermittent assistance or substitute methods<br>1 = Needs attendant for self-care<br>0 = Total dependence                                               |  |
| <b>7. Turning in Bed and Adjusting Bed Clothes</b><br>4 = Normal function<br>3 = Somewhat slow and clumsy, but no help needed<br>2 = Can turn alone, or adjust sheets, but with great difficulty<br>1 = Can initiate, but not turn or adjust sheets alone<br>0 = Helpless                            |  |
| <b>8. Walking</b><br>4 = Normal<br>3 = Early ambulation difficulties<br>2 = Walks with assistance<br>1 = Nonambulatory functional movement only<br>0 = No purposeful leg movement                                                                                                                    |  |
| <b>9. Climbing Stairs</b><br>4 = Normal<br>3 = Slow<br>2 = Mild unsteadiness or fatigue<br>1 = Needs assistance<br>0 = Cannot do                                                                                                                                                                     |  |
| <b>R-1. Dyspnea</b><br>4 = None<br>3 = Occurs when walking<br>2 = Occurs with one or more of the following: eating, bathing, dressing<br>1 = Occurs at rest, difficulty breathing when either sitting or lying<br>0 = Significant difficulty, considering using mechanical respiratory support       |  |
| <b>R-2 Orthopnea</b><br>4 = None<br>3 = Some difficulty sleeping at night due to shortness of breath, does not routinely use more than two pillows<br>2 = Needs extra pillow in order to sleep (more than two)<br>1 = Can only sleep sitting up<br>0 = Unable to sleep without mechanical assistance |  |
| <b>R-3 Respiratory Insufficiency</b><br>4 = None<br>3 = Intermittent use of NIPPV<br>2 = Continuous use of NIPPV during the night<br>1 = Continuous use of NIPPV during the night and day<br>0 = Invasive mechanical ventilation by intubation or tracheostomy                                       |  |

## Answer ALS

|                                                                                           |                                                      |
|-------------------------------------------------------------------------------------------|------------------------------------------------------|
| Subject Number: <u>  7  </u> <u>  1  </u> <u>  3  </u> - <u>      </u> <u>      </u>      | Subject GUID: <u>  N  </u> <u>  E  </u> <u>  U  </u> |
| Date: <u>      </u> / <u>      </u> / <u>  2  </u> <u>  0  </u> <u>  1  </u> <u>  8  </u> | Evaluator Initials: <u>      </u> <u>      </u>      |
| Study Visit: <input checked="" type="checkbox"/> Screening Visit                          |                                                      |

Hand page 2 to caregiver

### ALS Cognitive Behavioral Screen (CBS)<sup>™</sup>

#### Attention

- a. Commands: *I am going to say some commands. Please listen carefully and then do what I say. (If patient is unable to indicate with finger, movement can be substituted with eyes, arm or other means).*
- |                                                                           |         |   |    |
|---------------------------------------------------------------------------|---------|---|----|
| 1. Point/indicate (with your finger) to the ceiling and then make a fist. | #errors | 0 | 1+ |
| 2. Touch your shoulder, point to the floor, and then make a fist.         | Score   | 1 | 0  |
- b. Mental Addition/Language: *I am going to say some phrases. I want you to tell me the number of syllables in each phrase. For example, "the table" has 3 syllables. (Repetition of each phrase is allowed once)*
- |                                                                           |         |   |    |
|---------------------------------------------------------------------------|---------|---|----|
| 1. The weather is nice (correct response: 5)      answer <u>      </u>    | #errors | 0 | 1+ |
| 2. Tomorrow will be sunny (correct response: 7)      answer <u>      </u> | Score   | 1 | 0  |
- (score 0 if >20 sec on either)
- c. Eye movements: Saccades and Antisaccades
- # of correct saccades out of 8:       /8      Score: 8/8 = 1 point, ≤7/8 = 0 points
- # of correct antisaccades out of 8:       /8      Score: 8/8 = 2 points, ≤7/8 = 1 point, ≤6/8=0 points

/5

#### Concentration

*I am going to say some numbers. After I say them, I want you to say them to me backwards, or in reverse order. For example, if I say 3-6, you would say 6-3. (If written, do not allow pt to write forward span. Discontinue after failure on 2 consecutive trials).*

|               | Correct       | Incorrect     |                       | Correct       | Incorrect     |                          |
|---------------|---------------|---------------|-----------------------|---------------|---------------|--------------------------|
| 2-9 (9-2)     | <u>      </u> | <u>      </u> | 7-8-6-4 (4-6-8-7)     | <u>      </u> | <u>      </u> | Maximum Span<br>Correct: |
| 6-4 (4-6)     | <u>      </u> | <u>      </u> | 5-4-1-9 (9-1-4-5)     | <u>      </u> | <u>      </u> |                          |
| 3-7-2 (2-7-3) | <u>      </u> | <u>      </u> | 8-2-5-9-3 (3-9-5-2-8) | <u>      </u> | <u>      </u> |                          |
| 5-8-1 (1-8-5) | <u>      </u> | <u>      </u> | 5-7-6-3-9 (9-3-6-7-5) | <u>      </u> | <u>      </u> |                          |

/5

#### Tracking/Monitoring

- a. Months: *Please say the months of the year backwards, starting with Dec.*
- |                                                                         |         |   |   |    |
|-------------------------------------------------------------------------|---------|---|---|----|
| Dec   Nov   Oct   Sept   Aug   Jul   June   May   Apr   Mar   Feb   Jan | #errors | 0 | 1 | 2+ |
|                                                                         | Score   | 2 | 1 | 0  |
- b. Alphabet: *Please say/write the alphabet*
- |                                                                                                       |         |   |    |
|-------------------------------------------------------------------------------------------------------|---------|---|----|
| A   B   C   D   E   F   G   H   I   J   K   L   M   N   O   P   Q   R   S   T   U   V   W   X   Y   Z | #errors | 0 | 1+ |
|                                                                                                       | Score   | 1 | 0  |
- c. Alternation Task: *I want you to alternate between numbers and letters, starting with 1-A, 2-B, 3-C, and so on. Please continue from there, alternating between # and letter, in order, until I tell you to stop.*  
(Errors: any mistake in sequencing, i.e. 7-H or 8-9)
- |                                                               |         |   |   |   |
|---------------------------------------------------------------|---------|---|---|---|
| 4-D   5-E   6-F   7-G   8-H   9-I   10-J   11-K   12-L   13-M | #errors | 0 | 1 | 2 |
|                                                               | Score   | 2 | 1 | 0 |

/5

#### Initiation and Retrieval

*Say/write as many words as you can think of starting with the letter F, as quickly as you can, in 1 min. You can't say/write the names of people, places or numbers. Please don't say/write the same word with a different ending, like truck and trucks. (S words can be substituted for F words). Errors: repetitions, rule violations.*

- |                                |                                 |                                 |                                              |     |      |    |    |
|--------------------------------|---------------------------------|---------------------------------|----------------------------------------------|-----|------|----|----|
| 1. <u>                    </u> | 9. <u>                    </u>  | 17. <u>                    </u> | #correct words                               | >12 | 12-8 | <8 | ≤4 |
| 2. <u>                    </u> | 10. <u>                    </u> | 18. <u>                    </u> | Score:                                       | 3   | 2    | 1  | 0* |
| 3. <u>                    </u> | 11. <u>                    </u> | 19. <u>                    </u> | plus                                         |     |      |    |    |
| 4. <u>                    </u> | 12. <u>                    </u> | 20. <u>                    </u> | #errors                                      | 0   | 1    | 2+ |    |
| 5. <u>                    </u> | 13. <u>                    </u> |                                 | Score                                        | 2   | 1    | 0  |    |
| 6. <u>                    </u> | 14. <u>                    </u> |                                 |                                              |     |      |    |    |
| 7. <u>                    </u> | 15. <u>                    </u> |                                 | *if ≤4 words, total verbal fluency score = 0 |     |      |    |    |
| 8. <u>                    </u> | 16. <u>                    </u> |                                 | regardless of # of errors                    |     |      |    |    |

/5

Copyright© 2006-2011 Sutter West Bay Hospitals, aba California Pacific Medical Center. All rights reserved.

**TOTAL SCORE**

/20

### Answer ALS

|                                                                  |                                                |
|------------------------------------------------------------------|------------------------------------------------|
| Subject Number: <u>7</u> <u>1</u> <u>3</u> - ____                | Subject GUID: <u>N</u> <u>E</u> <u>U</u> _____ |
| Date: ____/____/ <u>2</u> <u>0</u> <u>1</u> <u>8</u>             | Evaluator Initials: ____                       |
| Study Visit: <input checked="" type="checkbox"/> Screening Visit |                                                |

## Answer ALS

|                                                                                           |                                                      |
|-------------------------------------------------------------------------------------------|------------------------------------------------------|
| Subject Number: <u>  7  </u> <u>  1  </u> <u>  3  </u> - <u>      </u> <u>      </u>      | Subject GUID: <u>  N  </u> <u>  E  </u> <u>  U  </u> |
| Date: <u>      </u> / <u>      </u> / <u>  2  </u> <u>  0  </u> <u>  1  </u> <u>  8  </u> | Evaluator Initials: <u>      </u> <u>      </u>      |
| Study Visit: <input checked="" type="checkbox"/> Screening Visit                          |                                                      |

Caregiver Initials:               relationship:                     

### ALS CBS™ ALS Cognitive Behavioral Screen Caregiver Questionnaire

These questions pertain to possible changes that you have noticed since the onset of ALS symptoms. As best you can, consider changes that are unrelated to physical weakness. For example, question #1 asks about interest in activities. If the person can no longer play tennis but still seems interested in it (i.e. talks about it, watches it on t.v.), then you would circle 3 for no change in level of interest.

If the person has always had the trait in question, please respond No Change, since there has been no change over time.

#### Compared to before ALS, does he/she:

*Please circle a number*

|                                                                                                                                         | No<br>Change | Small<br>Change | Medium<br>Change | Large<br>Change |
|-----------------------------------------------------------------------------------------------------------------------------------------|--------------|-----------------|------------------|-----------------|
| 1. Have less interest in topics/events that used to be important to them?                                                               | 3            | 2               | 1                | 0               |
| 2. Show little emotion, or seem less responsive emotionally?                                                                            | 3            | 2               | 1                | 0               |
| 3. Seem more agreeable or pleasant than in the past with fewer worries?                                                                 | 3            | 2               | 1                | 0               |
| 4. Fail to think things through before acting?                                                                                          | 3            | 2               | 1                | 0               |
| 5. Seem more withdrawn from others but not sad?                                                                                         | 3            | 2               | 1                | 0               |
| 6. Get confused or distracted more easily?                                                                                              | 3            | 2               | 1                | 0               |
| 7. Have less ability to deal with frustration or stress?                                                                                | 3            | 2               | 1                | 0               |
| 8. Seem less concerned about the feelings or concerns of others than before:                                                            | 3            | 2               | 1                | 0               |
| 9. Get angry or irritable more easily than before?                                                                                      | 3            | 2               | 1                | 0               |
| 10. Seem more sarcastic or childlike than before?                                                                                       | 3            | 2               | 1                | 0               |
| 11. Eat more or have a new preference for particular foods (i.e. sweets)?                                                               | 3            | 2               | 1                | 0               |
| 12. Have more trouble changing opinions or adapting to new situations?                                                                  | 3            | 2               | 1                | 0               |
| 13. Show less judgment or more problems making good decisions<br>(i.e. regarding safety, finances, etc)                                 | 3            | 2               | 1                | 0               |
| 14. Have less awareness of obvious problems or changes, or deny them?                                                                   | 3            | 2               | 1                | 0               |
| 15. Have new problems with language, such as saying the wrong word more<br>often, making up new words, or declines in spelling ability? | 3            | 2               | 1                | 0               |

TOTAL SCORE:        / 45

#### The following questions relate to current symptoms, not changes over time:

Do you think your loved one:

|                                                      | YES    | NO     |
|------------------------------------------------------|--------|--------|
| • Seems depressed on most days?                      | [    ] | [    ] |
| • Seems anxious on most days?                        | [    ] | [    ] |
| • Seems extremely fatigued on most days?             | [    ] | [    ] |
| • Suffers from unexpected crying or laughing spells? | [    ] | [    ] |

Copyright© 2006-2011 Sutter West Bay Hospitals, aba California Pacific Medical Center. All rights reserved.

### Answer ALS

|                                                                  |                                                |
|------------------------------------------------------------------|------------------------------------------------|
| Subject Number: <u>7</u> <u>1</u> <u>3</u> - ____                | Subject GUID: <u>N</u> <u>E</u> <u>U</u> _____ |
| Date: ____/____/ <u>2</u> <u>0</u> <u>1</u> <u>8</u>             | Evaluator Initials: ____                       |
| Study Visit: <input checked="" type="checkbox"/> Screening Visit |                                                |



## Answer ALS

|                                                                                                    |                                                                                                |
|----------------------------------------------------------------------------------------------------|------------------------------------------------------------------------------------------------|
| Subject Number: <u>  7  </u> <u>  1  </u> <u>  3  </u> - <u>      </u> <u>      </u> <u>      </u> | Subject GUID: <u>  N  </u> <u>  E  </u> <u>  U  </u> <u>      </u> <u>      </u> <u>      </u> |
| Date: <u>      </u> / <u>      </u> / <u>  2  </u> <u>  0  </u> <u>  1  </u> <u>  8  </u>          | Evaluator Initials: <u>      </u> <u>      </u> <u>      </u>                                  |
| Study Visit: <input checked="" type="checkbox"/> Screening Visit                                   |                                                                                                |

| ASHWORTH SPASTICITY SCALE                                                                                                                                                                                                                                                                                                                                                                                                                                                                            |
|------------------------------------------------------------------------------------------------------------------------------------------------------------------------------------------------------------------------------------------------------------------------------------------------------------------------------------------------------------------------------------------------------------------------------------------------------------------------------------------------------|
| Date Performed: <u>      </u> <u>      </u> / <u>      </u> <u>      </u> / <u>      </u> <u>      </u> <u>      </u> <u>      </u>                                                                                                                                                                                                                                                                                                                                                                  |
| Evaluator's Initials: <u>                                </u>                                                                                                                                                                                                                                                                                                                                                                                                                                        |
| <p><b>*Key:</b></p> <ol style="list-style-type: none"> <li>1 No increase in muscle tone</li> <li>2 Slight increase in tone giving a "catch" when affected part is moved in flexion or extension</li> <li>3 More marked increase in tone but affected part is easily flexed.</li> <li>4 Considerable increase in tone; passive movement difficult.</li> <li>5 Affected part is rigid in flexion or extension.</li> <li>6 Not Tested</li> <li>7 Not Tested (subject unable to perform task)</li> </ol> |

| <u>Not Done</u>          | <u>Limb</u> | <u>Score*</u> |
|--------------------------|-------------|---------------|
| <input type="checkbox"/> | Right Arm   |               |
| <input type="checkbox"/> | Left Arm    |               |
| <input type="checkbox"/> | Right Leg   |               |
| <input type="checkbox"/> | Left Leg    |               |

## Answer ALS

|                                                                  |                                                |
|------------------------------------------------------------------|------------------------------------------------|
| Subject Number: <u>7</u> <u>1</u> <u>3</u> - _____               | Subject GUID: <u>N</u> <u>E</u> <u>U</u> _____ |
| Date: ____/____/20 <u>1</u> <u>8</u>                             | Evaluator Initials: _____                      |
| Study Visit: <input checked="" type="checkbox"/> Screening Visit |                                                |

| REFLEXES                       |
|--------------------------------|
| Date Performed: ____/____/____ |
| Evaluator's Initials: _____    |

**Instructions:**

If the reflex was a **1+ or 2+**, was the reflex ABNORMALLY retained in a weak/wasted limb suggesting hyperreflexia?  
Please answer by checking the appropriate box as indicated below. 0 = Absent 1+ = Present

| Not Done                 | Cranial          | Absent                | Present               |
|--------------------------|------------------|-----------------------|-----------------------|
| <input type="checkbox"/> | Jaw Jerk         | <input type="radio"/> | <input type="radio"/> |
| <input type="checkbox"/> | Facial Reflex    | <input type="radio"/> | <input type="radio"/> |
| <input type="checkbox"/> | Palmomental Sign | <input type="radio"/> | <input type="radio"/> |

| Not Done                 | Right Cervical  | 0<br>(Absent)         | 1+<br>(Present)       | 2+                    | 3+                    | 4+                    | Retained in Weak Limb?                                                       |
|--------------------------|-----------------|-----------------------|-----------------------|-----------------------|-----------------------|-----------------------|------------------------------------------------------------------------------|
| <input type="checkbox"/> | Triceps Reflex  | <input type="radio"/> Yes <input type="radio"/> No <input type="radio"/> N/A |
| <input type="checkbox"/> | Biceps Reflex   | <input type="radio"/> Yes <input type="radio"/> No <input type="radio"/> N/A |
| <input type="checkbox"/> | Brachioradialis | <input type="radio"/> Yes <input type="radio"/> No <input type="radio"/> N/A |
| <input type="checkbox"/> | Finger Flexors  | <input type="radio"/> | <input type="radio"/> |                       |                       |                       |                                                                              |
| <input type="checkbox"/> | Clonus          | <input type="radio"/> | <input type="radio"/> |                       |                       |                       |                                                                              |
| <input type="checkbox"/> | Hoffman's Sign  | <input type="radio"/> | <input type="radio"/> |                       |                       |                       |                                                                              |

| Not Done                 | Left Cervical   | 0<br>(Absent)         | 1+<br>(Present)       | 2+                    | 3+                    | 4+                    | Retained in Weak Limb?                                                       |
|--------------------------|-----------------|-----------------------|-----------------------|-----------------------|-----------------------|-----------------------|------------------------------------------------------------------------------|
| <input type="checkbox"/> | Triceps Reflex  | <input type="radio"/> Yes <input type="radio"/> No <input type="radio"/> N/A |
| <input type="checkbox"/> | Biceps Reflex   | <input type="radio"/> Yes <input type="radio"/> No <input type="radio"/> N/A |
| <input type="checkbox"/> | Brachioradialis | <input type="radio"/> Yes <input type="radio"/> No <input type="radio"/> N/A |
| <input type="checkbox"/> | Finger Flexors  | <input type="radio"/> | <input type="radio"/> |                       |                       |                       |                                                                              |
| <input type="checkbox"/> | Clonus          | <input type="radio"/> | <input type="radio"/> |                       |                       |                       |                                                                              |
| <input type="checkbox"/> | Hoffman's Sign  | <input type="radio"/> | <input type="radio"/> |                       |                       |                       |                                                                              |

## Answer ALS

|                                                                                                    |                                                                                                |
|----------------------------------------------------------------------------------------------------|------------------------------------------------------------------------------------------------|
| Subject Number: <u>  7  </u> <u>  1  </u> <u>  3  </u> - <u>      </u> <u>      </u> <u>      </u> | Subject GUID: <u>  N  </u> <u>  E  </u> <u>  U  </u> <u>      </u> <u>      </u> <u>      </u> |
| Date: <u>      </u> / <u>      </u> / <u>  2  </u> <u>  0  </u> <u>  1  </u> <u>  8  </u>          | Evaluator Initials: <u>      </u> <u>      </u> <u>      </u>                                  |
| Study Visit: <input checked="" type="checkbox"/> Screening Visit                                   |                                                                                                |

| Not Done                 | Right Lumbosacral | 0<br>(Absent)         | 1+<br>(Present)       | 2+                    | 3+                    | 4+                    | Retained in Weak Limb?                                                       |
|--------------------------|-------------------|-----------------------|-----------------------|-----------------------|-----------------------|-----------------------|------------------------------------------------------------------------------|
| <input type="checkbox"/> | Patellar          | <input type="radio"/> Yes <input type="radio"/> No <input type="radio"/> N/A |
| <input type="checkbox"/> | Ankle             | <input type="radio"/> Yes <input type="radio"/> No <input type="radio"/> N/A |
| <input type="checkbox"/> | Crossed Adduction | <input type="radio"/> | <input type="radio"/> |                       |                       |                       |                                                                              |
| <input type="checkbox"/> | Clonus            | <input type="radio"/> | <input type="radio"/> |                       |                       |                       |                                                                              |
| <input type="checkbox"/> | Babinski Sign     | <input type="radio"/> | <input type="radio"/> |                       |                       |                       |                                                                              |

| Not Done                 | Left Lumbosacral  | 0<br>(Absent)         | 1+<br>(Present)       | 2+                    | 3+                    | 4+                    | Retained in Weak Limb?                                                       |
|--------------------------|-------------------|-----------------------|-----------------------|-----------------------|-----------------------|-----------------------|------------------------------------------------------------------------------|
| <input type="checkbox"/> | Patellar          | <input type="radio"/> Yes <input type="radio"/> No <input type="radio"/> N/A |
| <input type="checkbox"/> | Ankle             | <input type="radio"/> Yes <input type="radio"/> No <input type="radio"/> N/A |
| <input type="checkbox"/> | Crossed Adduction | <input type="radio"/> | <input type="radio"/> |                       |                       |                       |                                                                              |
| <input type="checkbox"/> | Clonus            | <input type="radio"/> | <input type="radio"/> |                       |                       |                       |                                                                              |
| <input type="checkbox"/> | Babinski Sign     | <input type="radio"/> | <input type="radio"/> |                       |                       |                       |                                                                              |

## Answer ALS

|                                                                                           |                                                      |
|-------------------------------------------------------------------------------------------|------------------------------------------------------|
| Subject Number: <u>  7  </u> <u>  1  </u> <u>  3  </u> - <u>      </u>                    | Subject GUID: <u>  N  </u> <u>  E  </u> <u>  U  </u> |
| Date: <u>      </u> / <u>      </u> / <u>  2  </u> <u>  0  </u> <u>  1  </u> <u>  8  </u> | Evaluator Initials: <u>      </u>                    |
| Study Visit: <input checked="" type="checkbox"/> Screening Visit                          |                                                      |

|                                                                                                                                            |
|--------------------------------------------------------------------------------------------------------------------------------------------|
| <b>HAND HELD DYNAMOMETRY (HHD)</b><br>Date Performed: <u>      </u> / <u>      </u> / <u>      </u><br>Evaluator's Initials: <u>      </u> |
|--------------------------------------------------------------------------------------------------------------------------------------------|

| Not Tested | Muscle                          | Check if Not Done        | Trial 1 (lbs) | Trial 2 (lbs) | Trial 3 (lbs) (if needed) | Able to Break            |                          | Not Done Reason                                                      |
|------------|---------------------------------|--------------------------|---------------|---------------|---------------------------|--------------------------|--------------------------|----------------------------------------------------------------------|
|            |                                 |                          |               |               |                           | Y                        | N                        |                                                                      |
|            | LEFT SHOULDER FLEXION           | <input type="checkbox"/> |               |               |                           | <input type="checkbox"/> | <input type="checkbox"/> | <input type="checkbox"/> Too weak<br><input type="checkbox"/> Other: |
|            | RIGHT SHOULDER FLEXION          | <input type="checkbox"/> |               |               |                           | <input type="checkbox"/> | <input type="checkbox"/> | <input type="checkbox"/> Too weak<br><input type="checkbox"/> Other: |
|            | LEFT ELBOW FLEXION              | <input type="checkbox"/> |               |               |                           | <input type="checkbox"/> | <input type="checkbox"/> | <input type="checkbox"/> Too weak<br><input type="checkbox"/> Other: |
|            | RIGHT ELBOW FLEXION             | <input type="checkbox"/> |               |               |                           | <input type="checkbox"/> | <input type="checkbox"/> | <input type="checkbox"/> Too weak<br><input type="checkbox"/> Other: |
|            | LEFT ELBOW EXTENSION            | <input type="checkbox"/> |               |               |                           | <input type="checkbox"/> | <input type="checkbox"/> | <input type="checkbox"/> Too weak<br><input type="checkbox"/> Other: |
|            | RIGHT ELBOW EXTENSION           | <input type="checkbox"/> |               |               |                           | <input type="checkbox"/> | <input type="checkbox"/> | <input type="checkbox"/> Too weak<br><input type="checkbox"/> Other: |
|            | LEFT WRIST EXTENSION            | <input type="checkbox"/> |               |               |                           | <input type="checkbox"/> | <input type="checkbox"/> | <input type="checkbox"/> Too weak<br><input type="checkbox"/> Other: |
|            | RIGHT WRIST EXTENSION           | <input type="checkbox"/> |               |               |                           | <input type="checkbox"/> | <input type="checkbox"/> | <input type="checkbox"/> Too weak<br><input type="checkbox"/> Other: |
|            | LEFT HIP FLEXION                | <input type="checkbox"/> |               |               |                           | <input type="checkbox"/> | <input type="checkbox"/> | <input type="checkbox"/> Too weak<br><input type="checkbox"/> Other: |
|            | RIGHT HIP FLEXION               | <input type="checkbox"/> |               |               |                           | <input type="checkbox"/> | <input type="checkbox"/> | <input type="checkbox"/> Too weak<br><input type="checkbox"/> Other: |
|            | LEFT KNEE FLEXION               | <input type="checkbox"/> |               |               |                           | <input type="checkbox"/> | <input type="checkbox"/> | <input type="checkbox"/> Too weak<br><input type="checkbox"/> Other: |
|            | RIGHT KNEE FLEXION              | <input type="checkbox"/> |               |               |                           | <input type="checkbox"/> | <input type="checkbox"/> | <input type="checkbox"/> Too weak<br><input type="checkbox"/> Other: |
|            | LEFT KNEE EXTENSION             | <input type="checkbox"/> |               |               |                           | <input type="checkbox"/> | <input type="checkbox"/> | <input type="checkbox"/> Too weak<br><input type="checkbox"/> Other: |
|            | RIGHT KNEE EXTENSION            | <input type="checkbox"/> |               |               |                           | <input type="checkbox"/> | <input type="checkbox"/> | <input type="checkbox"/> Too weak<br><input type="checkbox"/> Other: |
|            | LEFT ANKLE DORSIFLEXION         | <input type="checkbox"/> |               |               |                           | <input type="checkbox"/> | <input type="checkbox"/> | <input type="checkbox"/> Too weak<br><input type="checkbox"/> Other: |
|            | RIGHT ANKLE DORSIFLEXION        | <input type="checkbox"/> |               |               |                           | <input type="checkbox"/> | <input type="checkbox"/> | <input type="checkbox"/> Too weak<br><input type="checkbox"/> Other: |
|            | LEFT FIRST DORSAL INTEROSSEOUS  | <input type="checkbox"/> |               |               |                           | <input type="checkbox"/> | <input type="checkbox"/> | <input type="checkbox"/> Too weak<br><input type="checkbox"/> Other: |
|            | RIGHT FIRST DORSAL INTEROSSEOUS | <input type="checkbox"/> |               |               |                           | <input type="checkbox"/> | <input type="checkbox"/> | <input type="checkbox"/> Too weak<br><input type="checkbox"/> Other: |

## Answer ALS

|                                                                  |                                                |
|------------------------------------------------------------------|------------------------------------------------|
| Subject Number: <u>7</u> <u>1</u> <u>3</u> - ____                | Subject GUID: <u>N</u> <u>E</u> <u>U</u> _____ |
| Date: ____/____/20 <u>1</u> <u>8</u>                             | Evaluator Initials: ____                       |
| Study Visit: <input checked="" type="checkbox"/> Screening Visit |                                                |

### GRIP STRENGTH TESTING

Date Performed: \_\_\_\_/\_\_\_\_/\_\_\_\_

Evaluator's Initials: \_\_\_\_\_

| Not Tested |                               | Trial 1 (pounds) | Trial 2 (pounds) | If "Not Tested", explain                                       |
|------------|-------------------------------|------------------|------------------|----------------------------------------------------------------|
|            | <b>LEFT GRIP</b><br>Setting:  |                  |                  | <input type="radio"/> Too weak<br><input type="radio"/> Other: |
|            | <b>RIGHT GRIP</b><br>Setting: |                  |                  | <input type="radio"/> Too weak<br><input type="radio"/> Other: |

### Brief Environmental Questionnaire

#### Geography:

In what city/state do you live? \_\_\_\_\_

In the time prior to your diagnosis, in what city/state did you live? \_\_\_\_\_

#### Toxin Exposure:

Have you used any of the following products more than twice per month for at least 6 months (check all that apply)?

- ☐ Insecticide sprays inside your home
- ☐ Insecticide sprays outside your home
- ☐ Herbicides

#### Head injury (more than one year prior to symptom onset):

Have you ever been admitted to the hospital for a head injury? ☐ Yes ☐ No

Have you ever been seen in the ED for a head injury? ☐ Yes ☐ No

Have you had any concussions? ☐ Yes ☐ No

If so, how many? \_\_\_\_\_

#### Habits:

Have you ever been a smoker? ☐ Yes ☐ No

Are you an active smoker? ☐ Yes ☐ No

If so, for how many years? \_\_\_\_\_

How many packs per day (on average)? \_\_\_\_\_

How much alcohol do you drink per week, if any? \_\_\_\_\_ (drinks per week)

In the 10 years prior to your diagnosis, approximately how much alcohol did you drink (on average per week), if any? \_\_\_\_\_ (drinks per week)

*Prior to your symptom onset:*

### Answer ALS

|                                                                  |                                                |
|------------------------------------------------------------------|------------------------------------------------|
| Subject Number: <u>7</u> <u>1</u> <u>3</u> - ____                | Subject GUID: <u>N</u> <u>E</u> <u>U</u> _____ |
| Date: ____/____/ <u>2</u> <u>0</u> <u>1</u> <u>8</u>             | Evaluator Initials: ____                       |
| Study Visit: <input checked="" type="checkbox"/> Screening Visit |                                                |

How many marathons have you run? \_\_\_\_\_

How many days per week do you exercise at least moderately (break a sweat)? \_\_\_\_\_

#### Military:

Were you in the military? ☐ Yes ☐ No

How many years? \_\_\_\_\_

Were you deployed outside the US? \_\_\_\_\_

If so, what years? \_\_\_\_\_

To where? \_\_\_\_\_

#### Work History:

Which of the following occupations have you had for at least 1 year (check all that apply)?

- ☐ Management Occupations
- ☐ Business and Financial Operations Occupations
- ☐ Computer and Mathematical Occupations
- ☐ Architecture and Engineering Occupations
- ☐ Life, Physical, and Social Science Occupations
- ☐ Community and Social Service Occupations
- ☐ Legal Occupations
- ☐ Education, Training, and Library Occupations
- ☐ Arts, Design, Entertainment, Sports, and Media Occupations
- ☐ Healthcare Practitioners and Technical Occupations
- ☐ Healthcare Support Occupations
- ☐ Protective Service Occupations
- ☐ Food Preparation and Serving Related Occupations
- ☐ Building and Grounds Cleaning and Maintenance Occupations
- ☐ Personal Care and Service Occupations
- ☐ Sales and Related Occupations
- ☐ Office and Administrative Support Occupations
- ☐ Farming, Fishing, and Forestry Occupations
- ☐ Construction and Extraction Occupations
- ☐ Installation, Maintenance, and Repair Occupations
- ☐ Production Occupations
- ☐ Transportation and Material Moving Occupations
- ☐ Military Specific Occupations

#### Sports History:

### Answer ALS

|                                                                                                    |                                                                                                |
|----------------------------------------------------------------------------------------------------|------------------------------------------------------------------------------------------------|
| Subject Number: <u>  7  </u> <u>  1  </u> <u>  3  </u> - <u>      </u> <u>      </u> <u>      </u> | Subject GUID: <u>  N  </u> <u>  E  </u> <u>  U  </u> <u>      </u> <u>      </u> <u>      </u> |
| Date: <u>      </u> / <u>      </u> / <u>  2  </u> <u>  0  </u> <u>  1  </u> <u>  8  </u>          | Evaluator Initials: <u>      </u> <u>      </u> <u>      </u>                                  |
| Study Visit: <input checked="" type="checkbox"/> Screening Visit                                   |                                                                                                |

| Sport<br>(Circle One)                                                                                                                         | Level (High School, College,<br>Amateur, Recreational,<br>Professional) | Number of Years |
|-----------------------------------------------------------------------------------------------------------------------------------------------|-------------------------------------------------------------------------|-----------------|
| Soccer<br>Football<br>Baseball<br>Hockey (ice/field)<br>Lacrosse<br>Track & Field/Distance<br>Running<br>Swimming<br>Tennis<br>Golf<br>Other: |                                                                         |                 |

#### PBMC COLLECTION (Cedars)

**Instructions:** Sites are to follow the Cedars SOP titled “Peripheral Blood Collection and Processing for Reprogramming to iPSCs” or “Peripheral Blood Collection and Processing for Cryopreservation.”

Please refer to section H of the site MOP for complete collection, processing, and shipping details.

Date Collected:               /               /                            

Collector’s Initials:                                 

Number of Tubes Collected:                                 

Date Tubes Shipped to Cedars-Sinai:               /               /                            

#### DNA – WHOLE BLOOD COLLECTION (NYGC)

### Answer ALS

|                                                                         |                                                            |
|-------------------------------------------------------------------------|------------------------------------------------------------|
| Subject Number: <u>  7  </u> <u>  1  </u> <u>  3  </u> - _____          | Subject GUID: <u>  N  </u> <u>  E  </u> <u>  U  </u> _____ |
| Date: ____ / ____ / <u>  2  </u> <u>  0  </u> <u>  1  </u> <u>  8  </u> | Evaluator Initials: _____                                  |
| Study Visit: <input checked="" type="checkbox"/> Screening Visit        |                                                            |

**Instructions:** All samples will be collected in accordance with the policies and guidelines of the site's institution.

Please refer to section H of the site MOP for complete collection, processing, and shipping details.

Date Collected: \_\_\_\_ / \_\_\_\_ / \_\_\_\_

Collector's Initials: \_\_\_\_\_

Time Collected: \_\_\_\_ : \_\_\_\_ (24-Hr Clock)

Number of tubes collected: \_\_\_\_\_

Date Tubes Shipped to the NYGC: \_\_\_\_ / \_\_\_\_ / \_\_\_\_

### DNA – ALIQUOT COLLECTION (MGH Biorepository)

**Instructions:** All samples will be collected in accordance with the policies and guidelines of the site's institution.

Please refer to section H of the site MOP for complete collection, processing, and shipping details.

Date Collected: \_\_\_\_ / \_\_\_\_ / \_\_\_\_

Collector's Initials: \_\_\_\_\_

Collection Number: \_\_\_\_\_

Time Collected: \_\_\_\_ : \_\_\_\_ (24-Hr Clock)

Time of aliquot: \_\_\_\_ : \_\_\_\_ (24-Hr Clock)

Number of 1.0mL aliquots: \_\_\_\_\_

Volume of LAST aliquot if less than 1.0mL: \_\_\_\_\_

Time aliquots put on dry ice: \_\_\_\_ : \_\_\_\_ (24-Hr Clock)

Time aliquots put in -70°C or -80°C freezer: \_\_\_\_ : \_\_\_\_ (24-Hr Clock)



### Answer ALS

|                                                                  |                                                |
|------------------------------------------------------------------|------------------------------------------------|
| Subject Number: <u>7</u> <u>1</u> <u>3</u> - _____               | Subject GUID: <u>N</u> <u>E</u> <u>U</u> _____ |
| Date: ____/____/ <u>2</u> <u>0</u> <u>1</u> <u>8</u>             | Evaluator Initials: _____                      |
| Study Visit: <input checked="" type="checkbox"/> Screening Visit |                                                |

| <b>PLASMA COLLECTION (MGH Biorepository)</b>                                                                                                                                                                                               |                                                    |
|--------------------------------------------------------------------------------------------------------------------------------------------------------------------------------------------------------------------------------------------|----------------------------------------------------|
| <b>Instructions:</b> Blood samples will be collected in accordance with the policies and guidelines of the site's institution.<br><br>Please refer to section H of the site MOP for complete collection, processing, and shipping details. |                                                    |
| Date Plasma Samples Collected: ____/____/____                                                                                                                                                                                              |                                                    |
| Collector's Initials: _____                                                                                                                                                                                                                |                                                    |
| Collection Number: _____                                                                                                                                                                                                                   | Place Sample Label Here                            |
| Time Collected:                                                                                                                                                                                                                            | ____ : ____ (24-Hr Clock)                          |
| Time centrifugation started:                                                                                                                                                                                                               | ____ : ____ (24-Hr Clock)                          |
| Speed of centrifugation:                                                                                                                                                                                                                   | __1750__ x gravity (g)                             |
| Duration of centrifugation:                                                                                                                                                                                                                | __10__ minutes                                     |
| Time aliquoted:                                                                                                                                                                                                                            | ____ : ____ (24-Hr Clock)                          |
| Time aliquots put on dry ice:                                                                                                                                                                                                              | ____ : ____ (24-Hr Clock)                          |
| Time aliquots put in -70°C or -80°C freezer:                                                                                                                                                                                               | ____ : ____ (24-Hr Clock)                          |
| Did plasma remain pink after centrifugation, indicating hemolysis?                                                                                                                                                                         | <input type="radio"/> Yes <input type="radio"/> No |

Number of full (0.5mL) aliquots: \_\_\_\_\_

Volume of aliquots: **0.5mL**

Volume of LAST aliquot if less than 0.5mL: \_\_\_\_\_

## Answer ALS

|                                                                      |                                                            |
|----------------------------------------------------------------------|------------------------------------------------------------|
| Subject Number: <u>  7  </u> <u>  1  </u> <u>  3  </u> - _____       | Subject GUID: <u>  N  </u> <u>  E  </u> <u>  U  </u> _____ |
| Date: ____/____/ <u>  2  </u> <u>  0  </u> <u>  1  </u> <u>  8  </u> | Evaluator Initials: _____                                  |
| Study Visit: <input checked="" type="checkbox"/> Screening Visit     |                                                            |

|                                                                                                                                |
|--------------------------------------------------------------------------------------------------------------------------------|
| <b>SERUM COLLECTION (MGH Biorepository)</b>                                                                                    |
| <b>Instructions:</b> Blood samples will be collected in accordance with the policies and guidelines of the site's institution. |
| Please refer to section H of the site MOP for complete collection, processing, and shipping details.                           |
| Date Serum Samples Collected: ____/____/____                                                                                   |
| Collector's Initials: _____                                                                                                    |
| Collection Number _____                                                                                                        |
| Time Collected: ____ : ____ (24-Hr Clock)                                                                                      |
| Time centrifugation started: : ____ : ____ (24-Hr Clock)                                                                       |
| Speed of centrifugation: <u> 1300 </u> x gravity (g)                                                                           |
| Duration of centrifugation: <u> 10 </u> minutes                                                                                |
| Time aliquoted: ____ : ____ (24-Hr Clock)                                                                                      |
| Time aliquots put on dry ice: ____ : ____ (24-Hr Clock)                                                                        |
| Time aliquots put in -70°C or -80°C freezer: ____ : ____ (24-Hr Clock)                                                         |
| Did serum remain pink after centrifugation, indicating hemolysis? <input type="radio"/> Yes <input type="radio"/> No           |

Number of full (0.5mL) aliquots: \_\_\_\_\_

Volume of aliquots: **0.5mL**

Volume of LAST aliquot if less than 0.5mL: \_\_\_\_\_

## Answer ALS

|                                                                  |                                                |
|------------------------------------------------------------------|------------------------------------------------|
| Subject Number: <u>7</u> <u>1</u> <u>3</u> - ____                | Subject GUID: <u>N</u> <u>E</u> <u>U</u> _____ |
| Date: ____/____/20 <u>1</u> <u>8</u>                             | Evaluator Initials: ____                       |
| Study Visit: <input checked="" type="checkbox"/> Screening Visit |                                                |

### PERMANENT ASSISTED VENTILATION (PAV)

Did the subject reach permanent assisted ventilation (PAV)\* during the study?

☐ Yes ☐ No

If yes, start date: \_\_\_\_/\_\_\_\_/\_\_\_\_

Comments:

---



---



---



---



---



---

\*Assisted ventilation is defined as permanent when BiPAP or invasive ventilation is used for > 22 hours in a 24 hour period for 7 consecutive days. Date started is the FIRST day of the 7 day period.

### NON-INVASIVE VENTILATION (NIVV)

☐ Subject has not used non-invasive ventilation (NIV) during the study period.

☐ Non-invasive ventilation (NIV) use is continuing at the end of the study.

| NIV Usage (Hours/Day) | Start Date | Stop Date |
|-----------------------|------------|-----------|
|                       |            |           |
|                       |            |           |
|                       |            |           |
|                       |            |           |
|                       |            |           |
|                       |            |           |

## Answer ALS

|                                                                  |                                                |
|------------------------------------------------------------------|------------------------------------------------|
| Subject Number: <u>7</u> <u>1</u> <u>3</u> - _____               | Subject GUID: <u>N</u> <u>E</u> <u>U</u> _____ |
| Date: ____/____/20 <u>18</u>                                     | Evaluator Initials: _____                      |
| Study Visit: <input checked="" type="checkbox"/> Screening Visit |                                                |

### FEEDING TUBE

Date recommended: \_\_\_\_/\_\_\_\_/\_\_\_\_

Date accepted: \_\_\_\_/\_\_\_\_/\_\_\_\_

Admission date: \_\_\_\_/\_\_\_\_/\_\_\_\_

Discharge date: \_\_\_\_/\_\_\_\_/\_\_\_\_

Type of Feeding Tube:    ☐ Nasogastric    ☐ Gastrostomy

Placement Method:

☐ General surgery

☐ Interventional radiology

☐ Microscopic Laparotomy

☐ Percutaneous Endoscopic Gastrostomy

☐ Other, specify: \_\_\_\_\_

Feeding tube was:    ☐ Prophylactic/Elective    ☐ Emergent

Morbidity/mortality related to feeding tube:

☐ Aspiration

☐ Death (please complete the Mortality Form)

☐ Excessive Pain

☐ Hemorrhage

☐ Local Infection

☐ Nausea/vomiting

☐ Oxygen desaturation/inadequate ventilation during procedure

☐ Peritonitis

☐ Procedure aborted secondary to anatomy

☐ Other, specify: \_\_\_\_\_

### Answer ALS

|                                                                  |                                                |
|------------------------------------------------------------------|------------------------------------------------|
| Subject Number: <u>7</u> <u>1</u> <u>3</u> - ____                | Subject GUID: <u>N</u> <u>E</u> <u>U</u> _____ |
| Date: ____/____/ <u>2</u> <u>0</u> <u>1</u> <u>8</u>             | Evaluator Initials: ____                       |
| Study Visit: <input checked="" type="checkbox"/> Screening Visit |                                                |

## TRACHEOSTOMY

Did the subject require a tracheostomy during the study?

☐ Yes☐ No

Date recommended: \_\_\_\_/\_\_\_\_/\_\_\_\_

Date of tracheotomy: \_\_\_\_/\_\_\_\_/\_\_\_\_

Admission date: \_\_\_\_/\_\_\_\_/\_\_\_\_

Discharge date: \_\_\_\_/\_\_\_\_/\_\_\_\_

Reason for tracheotomy:

- Respiratory Failure

- Secretion Control

☐ Other, specify: \_\_\_\_\_

## DIAPHRAGM PACING SYSTEM (DPS)

Did the subject have a diaphragm pacing system placed during the study?

☐ Yes    ☐ No    ☐ NA (placed prior to enrollment)

Admission Date: \_\_\_\_/\_\_\_\_/\_\_\_\_ (MM/DD/YYYY)

Date of Placement: \_\_\_\_/\_\_\_\_/\_\_\_\_ (MM/DD/YYYY)

Discharge Date: \_\_\_\_/\_\_\_\_/\_\_\_\_ (MM/DD/YYYY)

Comments:

---

---

---

---

---

## Answer ALS

|                                                                  |                                                |
|------------------------------------------------------------------|------------------------------------------------|
| Subject Number: <u>7</u> <u>1</u> <u>3</u> - _____               | Subject GUID: <u>N</u> <u>E</u> <u>U</u> _____ |
| Date: ____/____/20 <u>1</u> <u>8</u>                             | Evaluator Initials: _____                      |
| Study Visit: <input checked="" type="checkbox"/> Screening Visit |                                                |

| <b>PREGNANCY</b><br><b>(To be completed for female subjects only)</b>                                                                                                                                                                                                                                                                                                                                                                                        |                          |                          |                          |                          |                          |                          |                          |                          |
|--------------------------------------------------------------------------------------------------------------------------------------------------------------------------------------------------------------------------------------------------------------------------------------------------------------------------------------------------------------------------------------------------------------------------------------------------------------|--------------------------|--------------------------|--------------------------|--------------------------|--------------------------|--------------------------|--------------------------|--------------------------|
| Did the subject become pregnant during the study?: <input type="checkbox"/> Yes <input type="checkbox"/> No                                                                                                                                                                                                                                                                                                                                                  |                          |                          |                          |                          |                          |                          |                          |                          |
| Date reported:                                                                                                                                                                                                                                                                                                                                                                                                                                               | ____/____/____           |                          |                          |                          |                          |                          |                          |                          |
| Start date of last menses:                                                                                                                                                                                                                                                                                                                                                                                                                                   | ____/____/____           |                          |                          |                          |                          |                          |                          |                          |
| Date pregnancy confirmed:                                                                                                                                                                                                                                                                                                                                                                                                                                    | ____/____/____           |                          |                          |                          |                          |                          |                          |                          |
| Anticipated date of childbirth:                                                                                                                                                                                                                                                                                                                                                                                                                              | ____/____/____           |                          |                          |                          |                          |                          |                          |                          |
| <b>Pregnancy History:</b>                                                                                                                                                                                                                                                                                                                                                                                                                                    |                          |                          |                          |                          |                          |                          |                          |                          |
|                                                                                                                                                                                                                                                                                                                                                                                                                                                              | 0                        | 1                        | 2                        | 3                        | 4                        | 5                        | 6                        | > 6                      |
| Number of Pregnancies                                                                                                                                                                                                                                                                                                                                                                                                                                        | <input type="checkbox"/> |
| Number of Normal Deliveries                                                                                                                                                                                                                                                                                                                                                                                                                                  | <input type="checkbox"/> |
| Spontaneous Miscarriage                                                                                                                                                                                                                                                                                                                                                                                                                                      | <input type="checkbox"/> |
| Other (please specify): _____                                                                                                                                                                                                                                                                                                                                                                                                                                |                          |                          |                          |                          |                          |                          |                          |                          |
| <b>Pregnancy Outcome:</b>                                                                                                                                                                                                                                                                                                                                                                                                                                    |                          |                          |                          |                          |                          |                          |                          |                          |
| <div style="display: flex; justify-content: space-between;"> <div> <input type="checkbox"/> Not known at this date<br/> <input type="checkbox"/> Still Birth<br/> <input type="checkbox"/> Uneventful (normal/healthy baby)<br/> <input type="checkbox"/> Neonatal death         </div> <div> <input type="checkbox"/> Induced Abortion<br/> <input type="checkbox"/> Spontaneous Abortion<br/> <input type="checkbox"/> Birth defects         </div> </div> |                          |                          |                          |                          |                          |                          |                          |                          |
| Comments: _____                                                                                                                                                                                                                                                                                                                                                                                                                                              |                          |                          |                          |                          |                          |                          |                          |                          |
| Date of outcome: ____/____/____                                                                                                                                                                                                                                                                                                                                                                                                                              |                          |                          |                          |                          |                          |                          |                          |                          |
| Pregnancy reported by (study staff name): _____                                                                                                                                                                                                                                                                                                                                                                                                              |                          |                          |                          |                          |                          |                          |                          |                          |

### Answer ALS

|                                                                  |                                                |
|------------------------------------------------------------------|------------------------------------------------|
| Subject Number: <u>7</u> <u>1</u> <u>3</u> - ____                | Subject GUID: <u>N</u> <u>E</u> <u>U</u> _____ |
| Date: ____/____/20 <u>18</u>                                     | Evaluator Initials: ____                       |
| Study Visit: <input checked="" type="checkbox"/> Screening Visit |                                                |

| SUBJECT FINAL DISPOSITION                                                                                                                                                                                                                  |                                                           |
|--------------------------------------------------------------------------------------------------------------------------------------------------------------------------------------------------------------------------------------------|-----------------------------------------------------------|
| <p>Subject's participation in this study has ended.</p> <p style="margin-left: 40px;"> <input type="checkbox"/> Yes<br/> <input type="checkbox"/> No         </p> <p>If <b>Yes</b>, please select <b>one</b> of the following options:</p> |                                                           |
| <input type="checkbox"/> Subject was a Screen Failure                                                                                                                                                                                      | <p>Date of Screen Failure: _____</p> <p>Reason: _____</p> |
| <input type="checkbox"/> Subject died (Please complete Mortality Form)                                                                                                                                                                     |                                                           |
| <input type="checkbox"/> Discontinued Participation<br>If Discontinued Participation, Date Last Known Alive: ____/____/____                                                                                                                |                                                           |
| <input type="checkbox"/> Other (Specify): _____<br>If Other, Date Last Known Alive: ____/____/____                                                                                                                                         |                                                           |

| MORTALITY FORM                                                                                                                                                                         |
|----------------------------------------------------------------------------------------------------------------------------------------------------------------------------------------|
| Did the subject die? <input type="checkbox"/> Yes <input type="checkbox"/> No                                                                                                          |
| <p style="text-align: center;">If <b>Yes</b>:</p> <p style="margin-left: 40px;">Date of death: ____/____/____ (MM/DD/YYYY)</p> <p style="margin-left: 40px;">Cause of death: _____</p> |
| ICD-10 CM Code for cause of death: _____                                                                                                                                               |
| Was a general autopsy performed? <input type="checkbox"/> Yes <input type="checkbox"/> No                                                                                              |
| <p style="margin-left: 40px;">If <b>Yes</b>, Date of Autopsy: ____/____/____ (MM/DD/YYYY)</p> <p style="margin-left: 40px;">If <b>YES</b>, location of autopsy: _____</p>              |
| If <b>Yes</b> , has a copy of the autopsy report been obtained? <input type="checkbox"/> Yes <input type="checkbox"/> No                                                               |
