# Supplementary material for: Answer ALS: A Large-Scale Resource for Sporadic and Familial ALS Combining Clinical Data with Multi-Omics Data from Induced Pluripotent Cell Lines
Source: Research Square preprint supplement (doi:10.21203/rs.3.rs-96858/v1), 2020-10-28
Supplement: Supplementary file 2 [file 8dfa3dabcd07b7b4cbd049c5.docx]

**Extended Data Table 1. Clinic Locations for Answer ALS**

| **Clinic** | **Location** | **Local PI** |
| --- | --- | --- |
| Johns Hopkins University | Baltimore, MD | Nick Maragakis MD |
| Massacchusetts General Hospital | Boston, MA | James Berry MD |
| Emory University | Atlanta, GA | Jon Glass MD |
| Washington University | St. Louis, MO | Tim Miller MD, PhD |
| Northwestern University | Chicago, IL | Senda Ajroud-Driss MD |
| Texas Neurology | Dallas, TX | Daragh Heitzman MD |
| Cedars Sinai Medical Center | Los Angeles, CA | Robert Baloh MD, PhD |

**Extended Data Table 2. Answer ALS Clinical Events**

|  | Enrollment | Follow-up Period | | | | Post Participation Followup Period1 |
| --- | --- | --- | --- | --- | --- | --- |
| Week | 0 | 12 | 24 | 36 | 48 | Every 3 months |
| Window |  | 84±42 days | 168±42 days | 252±42 days | 336±42 days | (±42 days) |
| Visit Number | Screening/Visit 1 | Visit 2 | Visit 3 | Visit 4 | Visit 5 | Follow-up |
| Eligibility/Consenting |  |  |  |  |  |  |
| Written informed consent | XHC |  | | | | |
| Inclusion/Exclusion review | XHC |
| Clinical Information Collection | | | | | | |
| Medical History/Demographics* | XHC |  | | | | |
| Create GUID* | XHC |
| ALS History/Genetics* | X |
| Environmental Questionnaire* | XHC |
| Concommitant Medication review* | XHC | XHC | X | = | X |  |
| Adverse Event Review* | XHC | XHC | X | X | X |
| Key Study Event Review | X | X | X | X | X | X |
| Vitals Signs/Height&Weight2 | XHC | XHC | X | X | X |  |
| Confirmation of Diagnosis* | XHC | XHC | X | X | X | X |
| Outcome Measure Collection | | | | | | |
| Slow vital capacity | X | X | X | X | X | X |
| Hand Held Dynamometry | XHC** | XHC** | X | X | X |  |
| Penn Upper Motor Neuron Burden (UMN-B)3 | XHC | X | X | X | X |
| ALSFRS-R* | X | X | X | X | X | X |
| ALS Cognitive Behavioral Scale (ALSCBS) | X | X | X | X | X |  |
| SAMPLE COLLECTION | | | | | | |
| Lumbar Puncture (CSF collection) OPTIONAL | XHC | XHC | X | X | X |  |
| Additional Blood Samples OPTIONAL | XHC | XHC | X | X | X |  |
| Biomarker Studies | XHC | XHC | X | X | X |  |

1 Follow-up continued every 3 months to collect data on survival status/Key Study Events. This information was obtained via chart review and/or participant contact.

2 Vital signs include systolic and diastolic pressure in mmHg, respiratory rate/minute, heart rate/minute, temperature and weight. Height measured at Screening Visit only.

3 The Penn Upper Motor Neuron-Burden (UMN-B) includes testing of reflexes, the CNS Lability Scale (CNS-LS) and the Ashworth Spasticity Scale

4 The participant may choose to have CSF collected at any visit (if only collected once), all visits, or no visits.

5 Additional blood samples include Uric Acid, Creatinine, Phosphorus, and Creatine Kinase (CK).

6 Biomarker Studies included blood samples for plasma, serum, whole blood for DNA and aliquots, and PBMC collection. PBMC was collected at Visit I. Whole blood for DNA sequencing was drawn once at any visit, preferably Visit 1. Whole blood can be drawn at any visit for aliquot. Plasma and serum were collected at each visit. Plasma and serum were stored in the NEALS Biorepository for future analysis. Please refer to the Site Manual of Procedures (MOP) for collection, storage, and shipping information.

HCProcedures to be completed also by healthy control volunteers,

HC** HHD is optional for healthy control (!·IC) volunteers only

* Procedures with an asterisk(*) were completed via the telephone if these measures were not collected at the scheduled visits.

**Extended Data Table 3. Data and Biospecimen Sources.**The authors declare that all data supporting the findings of this study are available within the paper and its supplementary information files and web portals listed in this table.

| **Reagent** | **Location** | **Web Address** |
| --- | --- | --- |
| Clinical Data sets | Neurobank | http://www.neurobank.org |
| Whole Genome | NY Genome Center | https://www.nygenome.org/als-consortium/ |
| Induced Pluripotent cell lines | Cedars Sinai | https://www.cedars-sinai.edu/Research/Research-Cores/Induced-Pluripotent-Stem-Cell-Core-/Answer-ALS-Project.aspx |
| Biofluids (serum, CSF) | Neurobank | https://www.neals.org/for-als-researchers/neals-sample-repository/ |
| ALL Clinical and Omics data (transcriptome, proteome, epigenome) | Answer ALS | http://data.answerals.org |

**Extended Data Table 4**. Overall Clinical Demographics

**Extended Data Table 5**. Fast vs Slow Progression Demographics

| **Table 1** | |
| --- | --- |
| **Test Description** | **Test Specification** |
| *Mycoplasma Detection* | No contamination detected |
| *Alkaline Phosphatase Staining* | Confirm positive AP staining |
| *Karyotype by G-Banding* | Confirm normal karyotype |
| *Immunocytochemistry (IF-IC)* | Confirm positive expression of OCT3/4, NANOG, SOX2, TRA-1-60, TRA-1-81, SSEA4 |
| [*TaqMan® hPSC Scorecard™ Assay*](http://www.lifetechnologies.com/us/en/home/life-science/stem-cell-research/taqman-hpsc-scorecard-panel.html) | Confirm appropriate expression of self-renewal factors and tri-lineage differentiation potential to endoderm, ectoderm and mesoderm |
| *EB Formation* | Confirm successful Embryoid Body (EB) formation after 14 days |
| *Genomic DNA PCR* | Confirm the presence or absence of exogenous reprogramming plasmids |
| [*TCRB + TCRG T-Cell Clonality Assay*](https://www.invivoscribe.com/product/tcrb-tcrg-t-cell-clonality-assay-gel-detection) | Confirm presence or absence of clonal T-cell receptor beta chain and gamma chain gene rearrangements in iPSCs |
| [*STR Analysis*](http://www.idexxbioresearch.com/cellcheck) | Confirm identity matching score is above 80% |

**Extended Data Table 6. Characterization and Validation of IPS cell lines**
